# Supplementary material
Source: publisher figshare collection journal article supplement (https://frontiersin.figshare.com/ndownloader/files/31683896)
Supplement: Supplementary file 1 [file 31683896]

pair.no	ind1.id	ind2.id	group	quellergt	Level	PopLevel
1	01_1	01_2	0101	0.6074	WithinCol	Focal
2	01_1	01_3	0101	-0.949	WithinCol	Focal
3	01_1	01_4	0101	-1.2553	WithinCol	Focal
4	01_1	01_5	0101	0.5445	WithinCol	Focal
5	01_1	01_6	0101	-0.0499	WithinCol	Focal
6	01_1	01_7	0101	0.4857	WithinCol	Focal
7	01_1	02_8	0102	-0.9797	BetweenCol	Focal
8	01_1	03_9	0103	0.4605	BetweenCol	Focal
9	01_1	03_10	0103	0.4605	BetweenCol	Focal
10	01_1	03_11	0103	0.4605	BetweenCol	Focal
11	01_1	04_12	0104	0.672	BetweenCol	Focal
12	01_1	04_13	0104	0.672	BetweenCol	Focal
13	01_1	05_14	0105	-0.1479	BetweenCol	Focal
14	01_1	05_15	0105	1	BetweenCol	Focal
15	01_1	06_16	0106	0.0362	BetweenCol	Focal
16	01_1	06_17	0106	0.0231	BetweenCol	Focal
17	01_1	06_18	0106	0.3761	BetweenCol	Focal
18	01_1	06_19	0106	0.1027	BetweenCol	Focal
19	01_1	07_20	0107	0.0904	BetweenCol	Focal
20	01_1	08_21	0108	-0.776	BetweenCol	Focal
21	01_1	08_22	0108	0.0362	BetweenCol	Focal
22	01_1	09_23	0109	-0.1479	BetweenCol	Focal
23	01_1	09_24	0109	0.789	BetweenCol	Focal
24	01_1	10_25	0110	0.6709	BetweenCol	Focal
25	01_1	10_26	0110	-0.1479	BetweenCol	Focal
26	01_1	11_27	0111	-0.5753	BetweenCol	Focal
27	01_1	12_28	0112	0.3761	BetweenCol	Focal
28	01_1	12_29	0112	0.6074	BetweenCol	Focal
29	01_1	03_30	0103	1	BetweenCol	Focal
30	01_1	03_31	0103	1	BetweenCol	Focal
31	01_1	03_32	0103	-0.1479	BetweenCol	Focal
32	01_1	03_33	0103	0.7534	BetweenCol	Focal
33	01_1	03_34	0103	-0.1479	BetweenCol	Focal
34	01_1	03_35	0103	0.1027	BetweenCol	Focal
35	01_1	03_36	0103	0.4605	BetweenCol	Focal
36	01_1	05_37	0105	-1.0472	BetweenCol	Focal
37	01_1	05_38	0105	-1.7177	BetweenCol	Focal
38	01_1	06_39	0106	-0.3031	BetweenCol	Focal
39	01_1	06_40	0106	-0.9797	BetweenCol	Focal
40	01_1	08_41	0108	-0.0389	BetweenCol	Focal
41	01_1	08_42	0108	-0.1227	BetweenCol	Focal
42	01_1	09_43	0109	-0.0389	BetweenCol	Focal
43	01_1	09_44	0109	-0.3261	BetweenCol	Focal
44	01_1	11_45	0111	-0.5952	BetweenCol	Focal
45	01_1	26_46	0126	0.2367	BetweenCol	Focal
46	01_1	26_47	0126	-0.3501	BetweenCol	Focal
47	01_1	26_48	0126	-0.7812	BetweenCol	Focal
48	01_1	29_49	0129	0.0362	BetweenCol	Focal
49	01_1	30_50	0130	1	BetweenCol	Focal
50	01_1	30_51	0130	-0.216	BetweenCol	Focal
51	01_1	30_52	0130	0.3761	BetweenCol	Focal
52	01_1	30_53	0130	-0.5816	BetweenCol	Focal
53	01_1	31_54	0131	-0.776	BetweenCol	Focal
54	01_1	31_55	0131	0.7118	BetweenCol	Focal
55	01_1	32_56	0132	0.7118	BetweenCol	Focal
56	01_1	32_57	0132	0.789	BetweenCol	Focal
57	01_1	32_58	0132	0.789	BetweenCol	Focal
58	01_1	33_59	0133	0.5445	BetweenCol	Focal
59	01_1	33_60	0133	-0.0389	BetweenCol	Focal
60	01_1	35_61	0135	-0.3501	BetweenCol	Focal
61	01_1	36_62	0136	0.0087	BetweenCol	Focal
62	01_1	36_63	0136	-0.3031	BetweenCol	Focal
63	01_1	37_64	0137	-0.4861	BetweenCol	Focal
64	01_1	37_65	0137	-0.0389	BetweenCol	Focal
65	01_1	38_66	0138	0.1027	BetweenCol	Focal
66	01_1	39_67	0139	-0.3261	BetweenCol	Focal
67	01_1	40_68	0140	0.6074	BetweenCol	Focal
68	01_1	40_69	0140	0.4857	BetweenCol	Focal
69	01_1	D1_70	01D1	-0.0499	BetweenCol	BetweenPop
70	01_1	D1_71	01D1	0.3761	BetweenCol	BetweenPop
71	01_1	DY_72	01DY	0.7118	BetweenCol	BetweenPop
72	01_1	D3_73	01D3	0.7534	BetweenCol	BetweenPop
73	01_1	D2_74	01D2	-0.1348	BetweenCol	BetweenPop
74	01_1	D2_75	01D2	-0.0596	BetweenCol	BetweenPop
75	01_1	D6_76	01D6	0.6074	BetweenCol	BetweenPop
76	01_1	D4_77	01D4	0.4605	BetweenCol	BetweenPop
77	01_1	D5_78	01D5	-0.1479	BetweenCol	BetweenPop
78	01_1	D4_79	01D4	0.4605	BetweenCol	BetweenPop
79	01_1	D4_80	01D4	0.4605	BetweenCol	BetweenPop
80	01_1	D5_81	01D5	0.3247	BetweenCol	BetweenPop
81	01_1	DZ_82	01DZ	0.3247	BetweenCol	BetweenPop
82	01_1	DZ_83	01DZ	0.1526	BetweenCol	BetweenPop
83	01_1	DY_84	01DY	0.3594	BetweenCol	BetweenPop
84	01_1	D3_85	01D3	-0.0499	BetweenCol	BetweenPop
85	01_1	D3_86	01D3	0.4605	BetweenCol	BetweenPop
86	01_1	D3_87	01D3	0.4605	BetweenCol	BetweenPop
87	01_1	D3_88	01D3	0.7534	BetweenCol	BetweenPop
88	01_1	01_89	0101	0.7118	WithinCol	Focal
89	01_2	01_3	0101	-2.1048	WithinCol	Focal
90	01_2	01_4	0101	-0.9756	WithinCol	Focal
91	01_2	01_5	0101	0.2318	WithinCol	Focal
92	01_2	01_6	0101	0.1569	WithinCol	Focal
93	01_2	01_7	0101	0.6709	WithinCol	Focal
94	01_2	02_8	0102	-0.3712	BetweenCol	Focal
95	01_2	03_9	0103	-0.113	BetweenCol	Focal
96	01_2	03_10	0103	-0.113	BetweenCol	Focal
97	01_2	03_11	0103	-0.113	BetweenCol	Focal
98	01_2	04_12	0104	-0.022	BetweenCol	Focal
99	01_2	04_13	0104	-0.022	BetweenCol	Focal
100	01_2	05_14	0105	0.2928	BetweenCol	Focal
101	01_2	05_15	0105	1	BetweenCol	Focal
102	01_2	06_16	0106	0.0362	BetweenCol	Focal
103	01_2	06_17	0106	-0.4058	BetweenCol	Focal
104	01_2	06_18	0106	0.3532	BetweenCol	Focal
105	01_2	06_19	0106	0.0546	BetweenCol	Focal
106	01_2	07_20	0107	-0.2301	BetweenCol	Focal
107	01_2	08_21	0108	-0.649	BetweenCol	Focal
108	01_2	08_22	0108	-0.1274	BetweenCol	Focal
109	01_2	09_23	0109	0.4295	BetweenCol	Focal
110	01_2	09_24	0109	0.5298	BetweenCol	Focal
111	01_2	10_25	0110	0.4702	BetweenCol	Focal
112	01_2	10_26	0110	0.2928	BetweenCol	Focal
113	01_2	11_27	0111	-1.0343	BetweenCol	Focal
114	01_2	12_28	0112	0.2403	BetweenCol	Focal
115	01_2	12_29	0112	0.4935	BetweenCol	Focal
116	01_2	03_30	0103	0.3909	BetweenCol	Focal
117	01_2	03_31	0103	0.3909	BetweenCol	Focal
118	01_2	03_32	0103	0.2928	BetweenCol	Focal
119	01_2	03_33	0103	0.239	BetweenCol	Focal
120	01_2	03_34	0103	0.2928	BetweenCol	Focal
121	01_2	03_35	0103	0.0546	BetweenCol	Focal
122	01_2	03_36	0103	0.069	BetweenCol	Focal
123	01_2	05_37	0105	-1.0426	BetweenCol	Focal
124	01_2	05_38	0105	-1.7177	BetweenCol	Focal
125	01_2	06_39	0106	-0.2725	BetweenCol	Focal
126	01_2	06_40	0106	-0.5007	BetweenCol	Focal
127	01_2	08_41	0108	-0.0815	BetweenCol	Focal
128	01_2	08_42	0108	0.2353	BetweenCol	Focal
129	01_2	09_43	0109	-0.0815	BetweenCol	Focal
130	01_2	09_44	0109	0.3912	BetweenCol	Focal
131	01_2	11_45	0111	-0.6976	BetweenCol	Focal
132	01_2	26_46	0126	0.4351	BetweenCol	Focal
133	01_2	26_47	0126	0.0141	BetweenCol	Focal
134	01_2	26_48	0126	-0.7524	BetweenCol	Focal
135	01_2	29_49	0129	0.0362	BetweenCol	Focal
136	01_2	30_50	0130	1	BetweenCol	Focal
137	01_2	30_51	0130	0.2497	BetweenCol	Focal
138	01_2	30_52	0130	0.3532	BetweenCol	Focal
139	01_2	30_53	0130	0.0932	BetweenCol	Focal
140	01_2	31_54	0131	-0.649	BetweenCol	Focal
141	01_2	31_55	0131	0.1063	BetweenCol	Focal
142	01_2	32_56	0132	0.2367	BetweenCol	Focal
143	01_2	32_57	0132	0.3514	BetweenCol	Focal
144	01_2	32_58	0132	0.3514	BetweenCol	Focal
145	01_2	33_59	0133	0.1526	BetweenCol	Focal
146	01_2	33_60	0133	-0.0815	BetweenCol	Focal
147	01_2	35_61	0135	0.0141	BetweenCol	Focal
148	01_2	36_62	0136	0.0221	BetweenCol	Focal
149	01_2	36_63	0136	-0.7349	BetweenCol	Focal
150	01_2	37_64	0137	-0.1545	BetweenCol	Focal
151	01_2	37_65	0137	-0.2961	BetweenCol	Focal
152	01_2	38_66	0138	0.0546	BetweenCol	Focal
153	01_2	39_67	0139	0.3912	BetweenCol	Focal
154	01_2	40_68	0140	1	BetweenCol	Focal
155	01_2	40_69	0140	0.3968	BetweenCol	Focal
156	01_2	D1_70	01D1	-0.0933	BetweenCol	BetweenPop
157	01_2	D1_71	01D1	0.3532	BetweenCol	BetweenPop
158	01_2	DY_72	01DY	0.2367	BetweenCol	BetweenPop
159	01_2	D3_73	01D3	0.1386	BetweenCol	BetweenPop
160	01_2	D2_74	01D2	-0.4488	BetweenCol	BetweenPop
161	01_2	D2_75	01D2	-0.5214	BetweenCol	BetweenPop
162	01_2	D6_76	01D6	0.4935	BetweenCol	BetweenPop
163	01_2	D4_77	01D4	-0.113	BetweenCol	BetweenPop
164	01_2	D5_78	01D5	-0.4702	BetweenCol	BetweenPop
165	01_2	D4_79	01D4	-0.113	BetweenCol	BetweenPop
166	01_2	D4_80	01D4	-0.113	BetweenCol	BetweenPop
167	01_2	D5_81	01D5	0.1628	BetweenCol	BetweenPop
168	01_2	DZ_82	01DZ	0.1628	BetweenCol	BetweenPop
169	01_2	DZ_83	01DZ	-0.011	BetweenCol	BetweenPop
170	01_2	DY_84	01DY	-0.5692	BetweenCol	BetweenPop
171	01_2	D3_85	01D3	-0.0299	BetweenCol	BetweenPop
172	01_2	D3_86	01D3	-0.2834	BetweenCol	BetweenPop
173	01_2	D3_87	01D3	-0.0499	BetweenCol	BetweenPop
174	01_2	D3_88	01D3	0.3761	BetweenCol	BetweenPop
175	01_2	01_89	0101	0.1063	WithinCol	Focal
176	01_3	01_4	0101	0.2657	WithinCol	Focal
177	01_3	01_5	0101	-1.0437	WithinCol	Focal
178	01_3	01_6	0101	-2.2366	WithinCol	Focal
179	01_3	01_7	0101	-1.9018	WithinCol	Focal
180	01_3	02_8	0102	-0.0981	BetweenCol	Focal
181	01_3	03_9	0103	-0.6308	BetweenCol	Focal
182	01_3	03_10	0103	-0.6308	BetweenCol	Focal
183	01_3	03_11	0103	-0.6308	BetweenCol	Focal
184	01_3	04_12	0104	-0.6308	BetweenCol	Focal
185	01_3	04_13	0104	-0.6308	BetweenCol	Focal
186	01_3	05_14	0105	-0.6078	BetweenCol	Focal
187	01_3	05_15	0105	-1.9018	BetweenCol	Focal
188	01_3	06_16	0106	-1.6951	BetweenCol	Focal
189	01_3	06_17	0106	-0.5689	BetweenCol	Focal
190	01_3	06_18	0106	-1.2424	BetweenCol	Focal
191	01_3	06_19	0106	-0.9614	BetweenCol	Focal
192	01_3	07_20	0107	-0.8864	BetweenCol	Focal
193	01_3	08_21	0108	-0.4895	BetweenCol	Focal
194	01_3	08_22	0108	-0.9614	BetweenCol	Focal
195	01_3	09_23	0109	-0.6311	BetweenCol	Focal
196	01_3	09_24	0109	-1.2023	BetweenCol	Focal
197	01_3	10_25	0110	-1.2424	BetweenCol	Focal
198	01_3	10_26	0110	-0.6078	BetweenCol	Focal
199	01_3	11_27	0111	1	BetweenCol	Focal
200	01_3	12_28	0112	-1.2768	BetweenCol	Focal
201	01_3	12_29	0112	-1.2768	BetweenCol	Focal
202	01_3	03_30	0103	-0.8283	BetweenCol	Focal
203	01_3	03_31	0103	-0.8283	BetweenCol	Focal
204	01_3	03_32	0103	-0.6078	BetweenCol	Focal
205	01_3	03_33	0103	-0.8283	BetweenCol	Focal
206	01_3	03_34	0103	-0.6078	BetweenCol	Focal
207	01_3	03_35	0103	-0.9614	BetweenCol	Focal
208	01_3	03_36	0103	-1.0437	BetweenCol	Focal
209	01_3	05_37	0105	-2.3361	BetweenCol	Focal
210	01_3	05_38	0105	1	BetweenCol	Focal
211	01_3	06_39	0106	-0.6826	BetweenCol	Focal
212	01_3	06_40	0106	0.3109	BetweenCol	Focal
213	01_3	08_41	0108	-0.9614	BetweenCol	Focal
214	01_3	08_42	0108	-0.4382	BetweenCol	Focal
215	01_3	09_43	0109	-0.9614	BetweenCol	Focal
216	01_3	09_44	0109	-0.8901	BetweenCol	Focal
217	01_3	11_45	0111	-0.4895	BetweenCol	Focal
218	01_3	26_46	0126	-1.9018	BetweenCol	Focal
219	01_3	26_47	0126	-0.6078	BetweenCol	Focal
220	01_3	26_48	0126	-0.1901	BetweenCol	Focal
221	01_3	29_49	0129	-1.6951	BetweenCol	Focal
222	01_3	30_50	0130	-1.871	BetweenCol	Focal
223	01_3	30_51	0130	-0.6078	BetweenCol	Focal
224	01_3	30_52	0130	-1.2424	BetweenCol	Focal
225	01_3	30_53	0130	-0.6685	BetweenCol	Focal
226	01_3	31_54	0131	-0.4895	BetweenCol	Focal
227	01_3	31_55	0131	-0.8283	BetweenCol	Focal
228	01_3	32_56	0132	-0.949	BetweenCol	Focal
229	01_3	32_57	0132	-0.8283	BetweenCol	Focal
230	01_3	32_58	0132	-0.8283	BetweenCol	Focal
231	01_3	33_59	0133	-0.6794	BetweenCol	Focal
232	01_3	33_60	0133	-0.9614	BetweenCol	Focal
233	01_3	35_61	0135	-0.6078	BetweenCol	Focal
234	01_3	36_62	0136	-0.991	BetweenCol	Focal
235	01_3	36_63	0136	-0.785	BetweenCol	Focal
236	01_3	37_64	0137	-0.1694	BetweenCol	Focal
237	01_3	37_65	0137	-0.785	BetweenCol	Focal
238	01_3	38_66	0138	-0.9614	BetweenCol	Focal
239	01_3	39_67	0139	-0.8901	BetweenCol	Focal
240	01_3	40_68	0140	-2.1048	BetweenCol	Focal
241	01_3	40_69	0140	-1.2768	BetweenCol	Focal
242	01_3	D1_70	01D1	-1.0211	BetweenCol	BetweenPop
243	01_3	D1_71	01D1	-1.2424	BetweenCol	BetweenPop
244	01_3	DY_72	01DY	-0.949	BetweenCol	BetweenPop
245	01_3	D3_73	01D3	-0.7357	BetweenCol	BetweenPop
246	01_3	D2_74	01D2	-0.785	BetweenCol	BetweenPop
247	01_3	D2_75	01D2	-0.785	BetweenCol	BetweenPop
248	01_3	D6_76	01D6	-1.2768	BetweenCol	BetweenPop
249	01_3	D4_77	01D4	-0.6308	BetweenCol	BetweenPop
250	01_3	D5_78	01D5	-0.8864	BetweenCol	BetweenPop
251	01_3	D4_79	01D4	-0.6308	BetweenCol	BetweenPop
252	01_3	D4_80	01D4	-0.6308	BetweenCol	BetweenPop
253	01_3	D5_81	01D5	-1.2768	BetweenCol	BetweenPop
254	01_3	DZ_82	01DZ	-1.2768	BetweenCol	BetweenPop
255	01_3	DZ_83	01DZ	-0.8864	BetweenCol	BetweenPop
256	01_3	DY_84	01DY	-0.4492	BetweenCol	BetweenPop
257	01_3	D3_85	01D3	-0.7264	BetweenCol	BetweenPop
258	01_3	D3_86	01D3	-0.0272	BetweenCol	BetweenPop
259	01_3	D3_87	01D3	-0.6794	BetweenCol	BetweenPop
260	01_3	D3_88	01D3	-0.949	BetweenCol	BetweenPop
261	01_3	01_89	0101	-0.8283	WithinCol	Focal
262	01_4	01_5	0101	-1.0576	WithinCol	Focal
263	01_4	01_6	0101	-0.4079	WithinCol	Focal
264	01_4	01_7	0101	-0.6688	WithinCol	Focal
265	01_4	02_8	0102	0.4093	BetweenCol	Focal
266	01_4	03_9	0103	-0.723	BetweenCol	Focal
267	01_4	03_10	0103	-0.723	BetweenCol	Focal
268	01_4	03_11	0103	-0.723	BetweenCol	Focal
269	01_4	04_12	0104	-1.0563	BetweenCol	Focal
270	01_4	04_13	0104	-1.0563	BetweenCol	Focal
271	01_4	05_14	0105	0.1509	BetweenCol	Focal
272	01_4	05_15	0105	-1.9018	BetweenCol	Focal
273	01_4	06_16	0106	-1.6951	BetweenCol	Focal
274	01_4	06_17	0106	-0.6581	BetweenCol	Focal
275	01_4	06_18	0106	-0.4041	BetweenCol	Focal
276	01_4	06_19	0106	-0.5478	BetweenCol	Focal
277	01_4	07_20	0107	-0.4322	BetweenCol	Focal
278	01_4	08_21	0108	-0.1464	BetweenCol	Focal
279	01_4	08_22	0108	-0.9614	BetweenCol	Focal
280	01_4	09_23	0109	0.2615	BetweenCol	Focal
281	01_4	09_24	0109	-1.1176	BetweenCol	Focal
282	01_4	10_25	0110	-0.9393	BetweenCol	Focal
283	01_4	10_26	0110	0.1509	BetweenCol	Focal
284	01_4	11_27	0111	0.1787	BetweenCol	Focal
285	01_4	12_28	0112	-0.2897	BetweenCol	Focal
286	01_4	12_29	0112	-0.6373	BetweenCol	Focal
287	01_4	03_30	0103	-1.1319	BetweenCol	Focal
288	01_4	03_31	0103	-1.1319	BetweenCol	Focal
289	01_4	03_32	0103	0.1509	BetweenCol	Focal
290	01_4	03_33	0103	-0.8136	BetweenCol	Focal
291	01_4	03_34	0103	0.1509	BetweenCol	Focal
292	01_4	03_35	0103	-0.5478	BetweenCol	Focal
293	01_4	03_36	0103	-0.8965	BetweenCol	Focal
294	01_4	05_37	0105	-0.0322	BetweenCol	Focal
295	01_4	05_38	0105	1	BetweenCol	Focal
296	01_4	06_39	0106	-0.0614	BetweenCol	Focal
297	01_4	06_40	0106	0.5523	BetweenCol	Focal
298	01_4	08_41	0108	-0.2335	BetweenCol	Focal
299	01_4	08_42	0108	0.1228	BetweenCol	Focal
300	01_4	09_43	0109	-0.2335	BetweenCol	Focal
301	01_4	09_44	0109	0.2009	BetweenCol	Focal
302	01_4	11_45	0111	-0.3417	BetweenCol	Focal
303	01_4	26_46	0126	-0.2892	BetweenCol	Focal
304	01_4	26_47	0126	0.278	BetweenCol	Focal
305	01_4	26_48	0126	0.2293	BetweenCol	Focal
306	01_4	29_49	0129	-1.6951	BetweenCol	Focal
307	01_4	30_50	0130	-1.871	BetweenCol	Focal
308	01_4	30_51	0130	0.1046	BetweenCol	Focal
309	01_4	30_52	0130	-0.4041	BetweenCol	Focal
310	01_4	30_53	0130	0.2058	BetweenCol	Focal
311	01_4	31_54	0131	-0.1464	BetweenCol	Focal
312	01_4	31_55	0131	-0.8297	BetweenCol	Focal
313	01_4	32_56	0132	-0.8886	BetweenCol	Focal
314	01_4	32_57	0132	-0.9631	BetweenCol	Focal
315	01_4	32_58	0132	-0.9631	BetweenCol	Focal
316	01_4	33_59	0133	-0.9526	BetweenCol	Focal
317	01_4	33_60	0133	-0.2335	BetweenCol	Focal
318	01_4	35_61	0135	0.278	BetweenCol	Focal
319	01_4	36_62	0136	-0.0967	BetweenCol	Focal
320	01_4	36_63	0136	0.0901	BetweenCol	Focal
321	01_4	37_64	0137	0.4915	BetweenCol	Focal
322	01_4	37_65	0137	-0.0778	BetweenCol	Focal
323	01_4	38_66	0138	-0.5478	BetweenCol	Focal
324	01_4	39_67	0139	0.2009	BetweenCol	Focal
325	01_4	40_68	0140	-0.9756	BetweenCol	Focal
326	01_4	40_69	0140	-0.5854	BetweenCol	Focal
327	01_4	D1_70	01D1	-0.245	BetweenCol	BetweenPop
328	01_4	D1_71	01D1	-0.4041	BetweenCol	BetweenPop
329	01_4	DY_72	01DY	-0.8886	BetweenCol	BetweenPop
330	01_4	D3_73	01D3	-0.7714	BetweenCol	BetweenPop
331	01_4	D2_74	01D2	-0.1813	BetweenCol	BetweenPop
332	01_4	D2_75	01D2	-0.1694	BetweenCol	BetweenPop
333	01_4	D6_76	01D6	-0.6373	BetweenCol	BetweenPop
334	01_4	D4_77	01D4	-0.723	BetweenCol	BetweenPop
335	01_4	D5_78	01D5	-0.1955	BetweenCol	BetweenPop
336	01_4	D4_79	01D4	-0.723	BetweenCol	BetweenPop
337	01_4	D4_80	01D4	-0.723	BetweenCol	BetweenPop
338	01_4	D5_81	01D5	-0.3997	BetweenCol	BetweenPop
339	01_4	DZ_82	01DZ	-0.3997	BetweenCol	BetweenPop
340	01_4	DZ_83	01DZ	-0.4551	BetweenCol	BetweenPop
341	01_4	DY_84	01DY	-0.6568	BetweenCol	BetweenPop
342	01_4	D3_85	01D3	-0.1829	BetweenCol	BetweenPop
343	01_4	D3_86	01D3	-0.3609	BetweenCol	BetweenPop
344	01_4	D3_87	01D3	-0.7574	BetweenCol	BetweenPop
345	01_4	D3_88	01D3	-0.8605	BetweenCol	BetweenPop
346	01_4	01_89	0101	-0.8297	WithinCol	Focal
347	01_5	01_6	0101	-0.1861	WithinCol	Focal
348	01_5	01_7	0101	0.5903	WithinCol	Focal
349	01_5	02_8	0102	-0.4705	BetweenCol	Focal
350	01_5	03_9	0103	0.0804	BetweenCol	Focal
351	01_5	03_10	0103	0.0804	BetweenCol	Focal
352	01_5	03_11	0103	0.0804	BetweenCol	Focal
353	01_5	04_12	0104	0.5815	BetweenCol	Focal
354	01_5	04_13	0104	0.5815	BetweenCol	Focal
355	01_5	05_14	0105	-0.6433	BetweenCol	Focal
356	01_5	05_15	0105	0.0074	BetweenCol	Focal
357	01_5	06_16	0106	-1.9018	BetweenCol	Focal
358	01_5	06_17	0106	-0.3091	BetweenCol	Focal
359	01_5	06_18	0106	-0.4183	BetweenCol	Focal
360	01_5	06_19	0106	-0.2631	BetweenCol	Focal
361	01_5	07_20	0107	0.1352	BetweenCol	Focal
362	01_5	08_21	0108	-0.755	BetweenCol	Focal
363	01_5	08_22	0108	-1.1042	BetweenCol	Focal
364	01_5	09_23	0109	-0.6826	BetweenCol	Focal
365	01_5	09_24	0109	0.836	BetweenCol	Focal
366	01_5	10_25	0110	0.5806	BetweenCol	Focal
367	01_5	10_26	0110	-0.6433	BetweenCol	Focal
368	01_5	11_27	0111	-0.8376	BetweenCol	Focal
369	01_5	12_28	0112	-0.5639	BetweenCol	Focal
370	01_5	12_29	0112	-0.0478	BetweenCol	Focal
371	01_5	03_30	0103	0.4148	BetweenCol	Focal
372	01_5	03_31	0103	0.4148	BetweenCol	Focal
373	01_5	03_32	0103	-0.6433	BetweenCol	Focal
374	01_5	03_33	0103	-0.0371	BetweenCol	Focal
375	01_5	03_34	0103	-0.6433	BetweenCol	Focal
376	01_5	03_35	0103	-0.2631	BetweenCol	Focal
377	01_5	03_36	0103	0.2103	BetweenCol	Focal
378	01_5	05_37	0105	-0.5097	BetweenCol	Focal
379	01_5	05_38	0105	-0.9075	BetweenCol	Focal
380	01_5	06_39	0106	-0.6664	BetweenCol	Focal
381	01_5	06_40	0106	-0.5407	BetweenCol	Focal
382	01_5	08_41	0108	-0.7327	BetweenCol	Focal
383	01_5	08_42	0108	-0.555	BetweenCol	Focal
384	01_5	09_43	0109	-0.7327	BetweenCol	Focal
385	01_5	09_44	0109	-0.56	BetweenCol	Focal
386	01_5	11_45	0111	-0.1079	BetweenCol	Focal
387	01_5	26_46	0126	-0.3837	BetweenCol	Focal
388	01_5	26_47	0126	-0.4462	BetweenCol	Focal
389	01_5	26_48	0126	-0.329	BetweenCol	Focal
390	01_5	29_49	0129	-1.9018	BetweenCol	Focal
391	01_5	30_50	0130	-1.871	BetweenCol	Focal
392	01_5	30_51	0130	-0.1983	BetweenCol	Focal
393	01_5	30_52	0130	-0.4183	BetweenCol	Focal
394	01_5	30_53	0130	-0.3588	BetweenCol	Focal
395	01_5	31_54	0131	-0.755	BetweenCol	Focal
396	01_5	31_55	0131	0.0385	BetweenCol	Focal
397	01_5	32_56	0132	0.1038	BetweenCol	Focal
398	01_5	32_57	0132	0.6908	BetweenCol	Focal
399	01_5	32_58	0132	0.6908	BetweenCol	Focal
400	01_5	33_59	0133	1	BetweenCol	Focal
401	01_5	33_60	0133	-0.7327	BetweenCol	Focal
402	01_5	35_61	0135	-0.4462	BetweenCol	Focal
403	01_5	36_62	0136	-0.1797	BetweenCol	Focal
404	01_5	36_63	0136	-0.9595	BetweenCol	Focal
405	01_5	37_64	0137	-1.0725	BetweenCol	Focal
406	01_5	37_65	0137	-0.9241	BetweenCol	Focal
407	01_5	38_66	0138	-0.2631	BetweenCol	Focal
408	01_5	39_67	0139	-0.56	BetweenCol	Focal
409	01_5	40_68	0140	0.2318	BetweenCol	Focal
410	01_5	40_69	0140	0.4185	BetweenCol	Focal
411	01_5	D1_70	01D1	-0.308	BetweenCol	BetweenPop
412	01_5	D1_71	01D1	-0.4183	BetweenCol	BetweenPop
413	01_5	DY_72	01DY	0.1038	BetweenCol	BetweenPop
414	01_5	D3_73	01D3	-0.1266	BetweenCol	BetweenPop
415	01_5	D2_74	01D2	-0.2775	BetweenCol	BetweenPop
416	01_5	D2_75	01D2	-1.2023	BetweenCol	BetweenPop
417	01_5	D6_76	01D6	-0.0478	BetweenCol	BetweenPop
418	01_5	D4_77	01D4	0.0804	BetweenCol	BetweenPop
419	01_5	D5_78	01D5	0.2275	BetweenCol	BetweenPop
420	01_5	D4_79	01D4	0.0804	BetweenCol	BetweenPop
421	01_5	D4_80	01D4	0.0804	BetweenCol	BetweenPop
422	01_5	D5_81	01D5	0.0548	BetweenCol	BetweenPop
423	01_5	DZ_82	01DZ	0.0548	BetweenCol	BetweenPop
424	01_5	DZ_83	01DZ	0.5842	BetweenCol	BetweenPop
425	01_5	DY_84	01DY	0.0893	BetweenCol	BetweenPop
426	01_5	D3_85	01D3	-0.2616	BetweenCol	BetweenPop
427	01_5	D3_86	01D3	-0.0739	BetweenCol	BetweenPop
428	01_5	D3_87	01D3	0.149	BetweenCol	BetweenPop
429	01_5	D3_88	01D3	0.0097	BetweenCol	BetweenPop
430	01_5	01_89	0101	0.0385	WithinCol	Focal
431	01_6	01_7	0101	-0.493	WithinCol	Focal
432	01_6	02_8	0102	-0.2394	BetweenCol	Focal
433	01_6	03_9	0103	0.4877	BetweenCol	Focal
434	01_6	03_10	0103	0.4877	BetweenCol	Focal
435	01_6	03_11	0103	0.4877	BetweenCol	Focal
436	01_6	04_12	0104	0.0757	BetweenCol	Focal
437	01_6	04_13	0104	0.0757	BetweenCol	Focal
438	01_6	05_14	0105	0.341	BetweenCol	Focal
439	01_6	05_15	0105	0.0074	BetweenCol	Focal
440	01_6	06_16	0106	-1.9018	BetweenCol	Focal
441	01_6	06_17	0106	-0.529	BetweenCol	Focal
442	01_6	06_18	0106	0.4122	BetweenCol	Focal
443	01_6	06_19	0106	-0.649	BetweenCol	Focal
444	01_6	07_20	0107	-0.033	BetweenCol	Focal
445	01_6	08_21	0108	0.269	BetweenCol	Focal
446	01_6	08_22	0108	-1.1042	BetweenCol	Focal
447	01_6	09_23	0109	0.4759	BetweenCol	Focal
448	01_6	09_24	0109	-0.3147	BetweenCol	Focal
449	01_6	10_25	0110	-0.4687	BetweenCol	Focal
450	01_6	10_26	0110	0.341	BetweenCol	Focal
451	01_6	11_27	0111	0.1214	BetweenCol	Focal
452	01_6	12_28	0112	0.3204	BetweenCol	Focal
453	01_6	12_29	0112	-0.3132	BetweenCol	Focal
454	01_6	03_30	0103	-0.113	BetweenCol	Focal
455	01_6	03_31	0103	-0.113	BetweenCol	Focal
456	01_6	03_32	0103	0.341	BetweenCol	Focal
457	01_6	03_33	0103	0.2945	BetweenCol	Focal
458	01_6	03_34	0103	0.341	BetweenCol	Focal
459	01_6	03_35	0103	-0.649	BetweenCol	Focal
460	01_6	03_36	0103	0.7169	BetweenCol	Focal
461	01_6	05_37	0105	-0.1243	BetweenCol	Focal
462	01_6	05_38	0105	-0.4143	BetweenCol	Focal
463	01_6	06_39	0106	-0.4994	BetweenCol	Focal
464	01_6	06_40	0106	-0.3926	BetweenCol	Focal
465	01_6	08_41	0108	0.0273	BetweenCol	Focal
466	01_6	08_42	0108	0.2781	BetweenCol	Focal
467	01_6	09_43	0109	0.0273	BetweenCol	Focal
468	01_6	09_44	0109	0.1656	BetweenCol	Focal
469	01_6	11_45	0111	-0.4441	BetweenCol	Focal
470	01_6	26_46	0126	0.0387	BetweenCol	Focal
471	01_6	26_47	0126	-0.3007	BetweenCol	Focal
472	01_6	26_48	0126	-0.6068	BetweenCol	Focal
473	01_6	29_49	0129	-1.9018	BetweenCol	Focal
474	01_6	30_50	0130	-1.871	BetweenCol	Focal
475	01_6	30_51	0130	-0.3926	BetweenCol	Focal
476	01_6	30_52	0130	0.4122	BetweenCol	Focal
477	01_6	30_53	0130	-0.658	BetweenCol	Focal
478	01_6	31_54	0131	0.269	BetweenCol	Focal
479	01_6	31_55	0131	-0.0908	BetweenCol	Focal
480	01_6	32_56	0132	-0.0237	BetweenCol	Focal
481	01_6	32_57	0132	-0.4183	BetweenCol	Focal
482	01_6	32_58	0132	-0.4183	BetweenCol	Focal
483	01_6	33_59	0133	-0.2985	BetweenCol	Focal
484	01_6	33_60	0133	0.0273	BetweenCol	Focal
485	01_6	35_61	0135	-0.3007	BetweenCol	Focal
486	01_6	36_62	0136	-0.3634	BetweenCol	Focal
487	01_6	36_63	0136	-0.9613	BetweenCol	Focal
488	01_6	37_64	0137	-0.0597	BetweenCol	Focal
489	01_6	37_65	0137	-0.1429	BetweenCol	Focal
490	01_6	38_66	0138	-0.649	BetweenCol	Focal
491	01_6	39_67	0139	0.1656	BetweenCol	Focal
492	01_6	40_68	0140	0.1569	BetweenCol	Focal
493	01_6	40_69	0140	-0.6548	BetweenCol	Focal
494	01_6	D1_70	01D1	0.6726	BetweenCol	BetweenPop
495	01_6	D1_71	01D1	0.4122	BetweenCol	BetweenPop
496	01_6	DY_72	01DY	-0.0237	BetweenCol	BetweenPop
497	01_6	D3_73	01D3	0.2091	BetweenCol	BetweenPop
498	01_6	D2_74	01D2	-1.5201	BetweenCol	BetweenPop
499	01_6	D2_75	01D2	-2.1048	BetweenCol	BetweenPop
500	01_6	D6_76	01D6	-0.3132	BetweenCol	BetweenPop
501	01_6	D4_77	01D4	0.4877	BetweenCol	BetweenPop
502	01_6	D5_78	01D5	-0.7016	BetweenCol	BetweenPop
503	01_6	D4_79	01D4	0.4877	BetweenCol	BetweenPop
504	01_6	D4_80	01D4	0.4877	BetweenCol	BetweenPop
505	01_6	D5_81	01D5	-0.8525	BetweenCol	BetweenPop
506	01_6	DZ_82	01DZ	-0.8525	BetweenCol	BetweenPop
507	01_6	DZ_83	01DZ	-0.5255	BetweenCol	BetweenPop
508	01_6	DY_84	01DY	-0.0492	BetweenCol	BetweenPop
509	01_6	D3_85	01D3	0.6897	BetweenCol	BetweenPop
510	01_6	D3_86	01D3	0.1976	BetweenCol	BetweenPop
511	01_6	D3_87	01D3	0.6843	BetweenCol	BetweenPop
512	01_6	D3_88	01D3	0.4312	BetweenCol	BetweenPop
513	01_6	01_89	0101	-0.0908	WithinCol	Focal
514	01_7	02_8	0102	-0.1357	BetweenCol	Focal
515	01_7	03_9	0103	-0.429	BetweenCol	Focal
516	01_7	03_10	0103	-0.429	BetweenCol	Focal
517	01_7	03_11	0103	-0.429	BetweenCol	Focal
518	01_7	04_12	0104	0.1526	BetweenCol	Focal
519	01_7	04_13	0104	0.1526	BetweenCol	Focal
520	01_7	05_14	0105	-0.0315	BetweenCol	Focal
521	01_7	05_15	0105	1	BetweenCol	Focal
522	01_7	06_16	0106	0.0362	BetweenCol	Focal
523	01_7	06_17	0106	-0.4261	BetweenCol	Focal
524	01_7	06_18	0106	-0.0819	BetweenCol	Focal
525	01_7	06_19	0106	0.2648	BetweenCol	Focal
526	01_7	07_20	0107	0.2566	BetweenCol	Focal
527	01_7	08_21	0108	-0.9797	BetweenCol	Focal
528	01_7	08_22	0108	0.0362	BetweenCol	Focal
529	01_7	09_23	0109	-0.0315	BetweenCol	Focal
530	01_7	09_24	0109	0.8088	BetweenCol	Focal
531	01_7	10_25	0110	1	BetweenCol	Focal
532	01_7	10_26	0110	-0.0315	BetweenCol	Focal
533	01_7	11_27	0111	-0.9797	BetweenCol	Focal
534	01_7	12_28	0112	-0.0819	BetweenCol	Focal
535	01_7	12_29	0112	0.6709	BetweenCol	Focal
536	01_7	03_30	0103	0.4857	BetweenCol	Focal
537	01_7	03_31	0103	0.4857	BetweenCol	Focal
538	01_7	03_32	0103	-0.0315	BetweenCol	Focal
539	01_7	03_33	0103	-0.0996	BetweenCol	Focal
540	01_7	03_34	0103	-0.0315	BetweenCol	Focal
541	01_7	03_35	0103	0.2648	BetweenCol	Focal
542	01_7	03_36	0103	-0.429	BetweenCol	Focal
543	01_7	05_37	0105	-1.0447	BetweenCol	Focal
544	01_7	05_38	0105	-1.0447	BetweenCol	Focal
545	01_7	06_39	0106	-0.4318	BetweenCol	Focal
546	01_7	06_40	0106	-0.1357	BetweenCol	Focal
547	01_7	08_41	0108	-0.4797	BetweenCol	Focal
548	01_7	08_42	0108	-0.0281	BetweenCol	Focal
549	01_7	09_43	0109	-0.4797	BetweenCol	Focal
550	01_7	09_44	0109	0.0614	BetweenCol	Focal
551	01_7	11_45	0111	-0.2647	BetweenCol	Focal
552	01_7	26_46	0126	0.0359	BetweenCol	Focal
553	01_7	26_47	0126	0.1192	BetweenCol	Focal
554	01_7	26_48	0126	-0.5544	BetweenCol	Focal
555	01_7	29_49	0129	0.0362	BetweenCol	Focal
556	01_7	30_50	0130	1	BetweenCol	Focal
557	01_7	30_51	0130	0.5655	BetweenCol	Focal
558	01_7	30_52	0130	-0.0819	BetweenCol	Focal
559	01_7	30_53	0130	0.2999	BetweenCol	Focal
560	01_7	31_54	0131	-0.9797	BetweenCol	Focal
561	01_7	31_55	0131	-0.0096	BetweenCol	Focal
562	01_7	32_56	0132	-0.0096	BetweenCol	Focal
563	01_7	32_57	0132	0.8088	BetweenCol	Focal
564	01_7	32_58	0132	0.8088	BetweenCol	Focal
565	01_7	33_59	0133	0.5903	BetweenCol	Focal
566	01_7	33_60	0133	-0.4797	BetweenCol	Focal
567	01_7	35_61	0135	0.1192	BetweenCol	Focal
568	01_7	36_62	0136	0.1163	BetweenCol	Focal
569	01_7	36_63	0136	-0.4318	BetweenCol	Focal
570	01_7	37_64	0137	-0.3248	BetweenCol	Focal
571	01_7	37_65	0137	-0.4797	BetweenCol	Focal
572	01_7	38_66	0138	0.2648	BetweenCol	Focal
573	01_7	39_67	0139	0.0614	BetweenCol	Focal
574	01_7	40_68	0140	0.6709	BetweenCol	Focal
575	01_7	40_69	0140	1	BetweenCol	Focal
576	01_7	D1_70	01D1	-0.493	BetweenCol	BetweenPop
577	01_7	D1_71	01D1	-0.0819	BetweenCol	BetweenPop
578	01_7	DY_72	01DY	-0.0096	BetweenCol	BetweenPop
579	01_7	D3_73	01D3	-0.0996	BetweenCol	BetweenPop
580	01_7	D2_74	01D2	0.3621	BetweenCol	BetweenPop
581	01_7	D2_75	01D2	0.0362	BetweenCol	BetweenPop
582	01_7	D6_76	01D6	0.6709	BetweenCol	BetweenPop
583	01_7	D4_77	01D4	-0.429	BetweenCol	BetweenPop
584	01_7	D5_78	01D5	0.3559	BetweenCol	BetweenPop
585	01_7	D4_79	01D4	-0.429	BetweenCol	BetweenPop
586	01_7	D4_80	01D4	-0.429	BetweenCol	BetweenPop
587	01_7	D5_81	01D5	0.7104	BetweenCol	BetweenPop
588	01_7	DZ_82	01DZ	0.7104	BetweenCol	BetweenPop
589	01_7	DZ_83	01DZ	0.752	BetweenCol	BetweenPop
590	01_7	DY_84	01DY	-0.3837	BetweenCol	BetweenPop
591	01_7	D3_85	01D3	-0.493	BetweenCol	BetweenPop
592	01_7	D3_86	01D3	-0.429	BetweenCol	BetweenPop
593	01_7	D3_87	01D3	-0.429	BetweenCol	BetweenPop
594	01_7	D3_88	01D3	-0.0996	BetweenCol	BetweenPop
595	01_7	01_89	0101	-0.0096	WithinCol	Focal
596	02_8	03_9	0203	-0.3486	BetweenCol	Focal
597	02_8	03_10	0203	-0.3486	BetweenCol	Focal
598	02_8	03_11	0203	-0.3486	BetweenCol	Focal
599	02_8	04_12	0204	-0.3191	BetweenCol	Focal
600	02_8	04_13	0204	-0.3191	BetweenCol	Focal
601	02_8	05_14	0205	0.4115	BetweenCol	Focal
602	02_8	05_15	0205	-1.9018	BetweenCol	Focal
603	02_8	06_16	0206	-1.6951	BetweenCol	Focal
604	02_8	06_17	0206	-0.8941	BetweenCol	Focal
605	02_8	06_18	0206	-0.0133	BetweenCol	Focal
606	02_8	06_19	0206	0.3267	BetweenCol	Focal
607	02_8	07_20	0207	-0.2092	BetweenCol	Focal
608	02_8	08_21	0208	0.5307	BetweenCol	Focal
609	02_8	08_22	0208	0.3239	BetweenCol	Focal
610	02_8	09_23	0209	0.248	BetweenCol	Focal
611	02_8	09_24	0209	-0.566	BetweenCol	Focal
612	02_8	10_25	0210	0.138	BetweenCol	Focal
613	02_8	10_26	0210	0.4115	BetweenCol	Focal
614	02_8	11_27	0211	-0.0633	BetweenCol	Focal
615	02_8	12_28	0212	-0.4335	BetweenCol	Focal
616	02_8	12_29	0212	-0.4138	BetweenCol	Focal
617	02_8	03_30	0203	-0.4497	BetweenCol	Focal
618	02_8	03_31	0203	-0.4497	BetweenCol	Focal
619	02_8	03_32	0203	0.4115	BetweenCol	Focal
620	02_8	03_33	0203	-0.4591	BetweenCol	Focal
621	02_8	03_34	0203	0.4115	BetweenCol	Focal
622	02_8	03_35	0203	0.3267	BetweenCol	Focal
623	02_8	03_36	0203	-0.7168	BetweenCol	Focal
624	02_8	05_37	0205	-0.291	BetweenCol	Focal
625	02_8	05_38	0205	-1.2864	BetweenCol	Focal
626	02_8	06_39	0206	-0.8676	BetweenCol	Focal
627	02_8	06_40	0206	0.1758	BetweenCol	Focal
628	02_8	08_41	0208	0.1734	BetweenCol	Focal
629	02_8	08_42	0208	0.3428	BetweenCol	Focal
630	02_8	09_43	0209	0.1734	BetweenCol	Focal
631	02_8	09_44	0209	0.0339	BetweenCol	Focal
632	02_8	11_45	0211	0.6187	BetweenCol	Focal
633	02_8	26_46	0226	-0.7747	BetweenCol	Focal
634	02_8	26_47	0226	0.1563	BetweenCol	Focal
635	02_8	26_48	0226	-0.6359	BetweenCol	Focal
636	02_8	29_49	0229	-1.6951	BetweenCol	Focal
637	02_8	30_50	0230	-1.871	BetweenCol	Focal
638	02_8	30_51	0230	0.3819	BetweenCol	Focal
639	02_8	30_52	0230	-0.0133	BetweenCol	Focal
640	02_8	30_53	0230	0.2795	BetweenCol	Focal
641	02_8	31_54	0231	0.5307	BetweenCol	Focal
642	02_8	31_55	0231	-0.6619	BetweenCol	Focal
643	02_8	32_56	0232	-1.2553	BetweenCol	Focal
644	02_8	32_57	0232	-0.2773	BetweenCol	Focal
645	02_8	32_58	0232	-0.2773	BetweenCol	Focal
646	02_8	33_59	0233	-0.4911	BetweenCol	Focal
647	02_8	33_60	0233	0.1734	BetweenCol	Focal
648	02_8	35_61	0235	0.1563	BetweenCol	Focal
649	02_8	36_62	0236	-0.8198	BetweenCol	Focal
650	02_8	36_63	0236	-0.5478	BetweenCol	Focal
651	02_8	37_64	0237	0.3055	BetweenCol	Focal
652	02_8	37_65	0237	-0.262	BetweenCol	Focal
653	02_8	38_66	0238	0.3267	BetweenCol	Focal
654	02_8	39_67	0239	0.0339	BetweenCol	Focal
655	02_8	40_68	0240	-0.3712	BetweenCol	Focal
656	02_8	40_69	0240	-0.1988	BetweenCol	Focal
657	02_8	D1_70	02D1	0.1664	BetweenCol	BetweenPop
658	02_8	D1_71	02D1	-0.0133	BetweenCol	BetweenPop
659	02_8	DY_72	02DY	-1.2553	BetweenCol	BetweenPop
660	02_8	D3_73	02D3	-0.8442	BetweenCol	BetweenPop
661	02_8	D2_74	02D2	-0.3672	BetweenCol	BetweenPop
662	02_8	D2_75	02D2	-0.3827	BetweenCol	BetweenPop
663	02_8	D6_76	02D6	-0.4138	BetweenCol	BetweenPop
664	02_8	D4_77	02D4	-0.3486	BetweenCol	BetweenPop
665	02_8	D5_78	02D5	-0.3814	BetweenCol	BetweenPop
666	02_8	D4_79	02D4	-0.3486	BetweenCol	BetweenPop
667	02_8	D4_80	02D4	-0.3486	BetweenCol	BetweenPop
668	02_8	D5_81	02D5	-0.5413	BetweenCol	BetweenPop
669	02_8	DZ_82	02DZ	-0.5413	BetweenCol	BetweenPop
670	02_8	DZ_83	02DZ	-0.0464	BetweenCol	BetweenPop
671	02_8	DY_84	02DY	-1.0563	BetweenCol	BetweenPop
672	02_8	D3_85	02D3	-0.5924	BetweenCol	BetweenPop
673	02_8	D3_86	02D3	-0.8083	BetweenCol	BetweenPop
674	02_8	D3_87	02D3	-0.7959	BetweenCol	BetweenPop
675	02_8	D3_88	02D3	-0.8974	BetweenCol	BetweenPop
676	02_8	01_89	0201	-0.6619	BetweenCol	Focal
677	03_9	03_10	0303	1	WithinCol	Focal
678	03_9	03_11	0303	1	WithinCol	Focal
679	03_9	04_12	0304	0.7761	BetweenCol	Focal
680	03_9	04_13	0304	0.7761	BetweenCol	Focal
681	03_9	05_14	0305	0.1341	BetweenCol	Focal
682	03_9	05_15	0305	0.0074	BetweenCol	Focal
683	03_9	06_16	0306	-1.9018	BetweenCol	Focal
684	03_9	06_17	0306	-0.1053	BetweenCol	Focal
685	03_9	06_18	0306	0.5675	BetweenCol	Focal
686	03_9	06_19	0306	-0.0967	BetweenCol	Focal
687	03_9	07_20	0307	0.05	BetweenCol	Focal
688	03_9	08_21	0308	0.6782	BetweenCol	Focal
689	03_9	08_22	0308	-0.1128	BetweenCol	Focal
690	03_9	09_23	0309	-0.0716	BetweenCol	Focal
691	03_9	09_24	0309	-0.0371	BetweenCol	Focal
692	03_9	10_25	0310	-0.1218	BetweenCol	Focal
693	03_9	10_26	0310	0.1341	BetweenCol	Focal
694	03_9	11_27	0311	0.1424	BetweenCol	Focal
695	03_9	12_28	0312	0.2796	BetweenCol	Focal
696	03_9	12_29	0312	-0.1409	BetweenCol	Focal
697	03_9	03_30	0303	0.5847	WithinCol	Focal
698	03_9	03_31	0303	0.5847	WithinCol	Focal
699	03_9	03_32	0303	0.1341	WithinCol	Focal
700	03_9	03_33	0303	0.8173	WithinCol	Focal
701	03_9	03_34	0303	0.1341	WithinCol	Focal
702	03_9	03_35	0303	-0.0967	WithinCol	Focal
703	03_9	03_36	0303	0.7897	WithinCol	Focal
704	03_9	05_37	0305	-0.3331	BetweenCol	Focal
705	03_9	05_38	0305	-0.4143	BetweenCol	Focal
706	03_9	06_39	0306	-0.7998	BetweenCol	Focal
707	03_9	06_40	0306	-0.8083	BetweenCol	Focal
708	03_9	08_41	0308	0.3033	BetweenCol	Focal
709	03_9	08_42	0308	0.1128	BetweenCol	Focal
710	03_9	09_43	0309	0.3033	BetweenCol	Focal
711	03_9	09_44	0309	-0.4532	BetweenCol	Focal
712	03_9	11_45	0311	0.0906	BetweenCol	Focal
713	03_9	26_46	0326	-0.0237	BetweenCol	Focal
714	03_9	26_47	0326	-0.363	BetweenCol	Focal
715	03_9	26_48	0326	-0.8161	BetweenCol	Focal
716	03_9	29_49	0329	-1.9018	BetweenCol	Focal
717	03_9	30_50	0330	-1.871	BetweenCol	Focal
718	03_9	30_51	0330	-0.4466	BetweenCol	Focal
719	03_9	30_52	0330	0.5675	BetweenCol	Focal
720	03_9	30_53	0330	-1.066	BetweenCol	Focal
721	03_9	31_54	0331	0.6782	BetweenCol	Focal
722	03_9	31_55	0331	0.5909	BetweenCol	Focal
723	03_9	32_56	0332	0.471	BetweenCol	Focal
724	03_9	32_57	0332	0.1879	BetweenCol	Focal
725	03_9	32_58	0332	0.1879	BetweenCol	Focal
726	03_9	33_59	0333	0.149	BetweenCol	Focal
727	03_9	33_60	0333	0.3033	BetweenCol	Focal
728	03_9	35_61	0335	-0.363	BetweenCol	Focal
729	03_9	36_62	0336	-0.6008	BetweenCol	Focal
730	03_9	36_63	0336	-0.5333	BetweenCol	Focal
731	03_9	37_64	0337	-0.401	BetweenCol	Focal
732	03_9	37_65	0337	-0.0399	BetweenCol	Focal
733	03_9	38_66	0338	-0.0967	BetweenCol	Focal
734	03_9	39_67	0339	-0.4532	BetweenCol	Focal
735	03_9	40_68	0340	-0.113	BetweenCol	Focal
736	03_9	40_69	0340	-0.444	BetweenCol	Focal
737	03_9	D1_70	03D1	0.7661	BetweenCol	BetweenPop
738	03_9	D1_71	03D1	0.5675	BetweenCol	BetweenPop
739	03_9	DY_72	03DY	0.471	BetweenCol	BetweenPop
740	03_9	D3_73	03D3	0.6012	BetweenCol	BetweenPop
741	03_9	D2_74	03D2	-0.9431	BetweenCol	BetweenPop
742	03_9	D2_75	03D2	-0.8283	BetweenCol	BetweenPop
743	03_9	D6_76	03D6	-0.1409	BetweenCol	BetweenPop
744	03_9	D4_77	03D4	1	BetweenCol	BetweenPop
745	03_9	D5_78	03D5	-0.3996	BetweenCol	BetweenPop
746	03_9	D4_79	03D4	1	BetweenCol	BetweenPop
747	03_9	D4_80	03D4	1	BetweenCol	BetweenPop
748	03_9	D5_81	03D5	-0.5303	BetweenCol	BetweenPop
749	03_9	DZ_82	03DZ	-0.5303	BetweenCol	BetweenPop
750	03_9	DZ_83	03DZ	-0.3336	BetweenCol	BetweenPop
751	03_9	DY_84	03DY	0.5099	BetweenCol	BetweenPop
752	03_9	D3_85	03D3	0.1	BetweenCol	BetweenPop
753	03_9	D3_86	03D3	0.3555	BetweenCol	BetweenPop
754	03_9	D3_87	03D3	1	BetweenCol	BetweenPop
755	03_9	D3_88	03D3	0.771	BetweenCol	BetweenPop
756	03_9	01_89	0301	0.5909	BetweenCol	Focal
757	03_10	03_11	0303	1	WithinCol	Focal
758	03_10	04_12	0304	0.7761	BetweenCol	Focal
759	03_10	04_13	0304	0.7761	BetweenCol	Focal
760	03_10	05_14	0305	0.1341	BetweenCol	Focal
761	03_10	05_15	0305	0.0074	BetweenCol	Focal
762	03_10	06_16	0306	-1.9018	BetweenCol	Focal
763	03_10	06_17	0306	-0.1053	BetweenCol	Focal
764	03_10	06_18	0306	0.5675	BetweenCol	Focal
765	03_10	06_19	0306	-0.0967	BetweenCol	Focal
766	03_10	07_20	0307	0.05	BetweenCol	Focal
767	03_10	08_21	0308	0.6782	BetweenCol	Focal
768	03_10	08_22	0308	-0.1128	BetweenCol	Focal
769	03_10	09_23	0309	-0.0716	BetweenCol	Focal
770	03_10	09_24	0309	-0.0371	BetweenCol	Focal
771	03_10	10_25	0310	-0.1218	BetweenCol	Focal
772	03_10	10_26	0310	0.1341	BetweenCol	Focal
773	03_10	11_27	0311	0.1424	BetweenCol	Focal
774	03_10	12_28	0312	0.2796	BetweenCol	Focal
775	03_10	12_29	0312	-0.1409	BetweenCol	Focal
776	03_10	03_30	0303	0.5847	WithinCol	Focal
777	03_10	03_31	0303	0.5847	WithinCol	Focal
778	03_10	03_32	0303	0.1341	WithinCol	Focal
779	03_10	03_33	0303	0.8173	WithinCol	Focal
780	03_10	03_34	0303	0.1341	WithinCol	Focal
781	03_10	03_35	0303	-0.0967	WithinCol	Focal
782	03_10	03_36	0303	0.7897	WithinCol	Focal
783	03_10	05_37	0305	-0.3331	BetweenCol	Focal
784	03_10	05_38	0305	-0.4143	BetweenCol	Focal
785	03_10	06_39	0306	-0.7998	BetweenCol	Focal
786	03_10	06_40	0306	-0.8083	BetweenCol	Focal
787	03_10	08_41	0308	0.3033	BetweenCol	Focal
788	03_10	08_42	0308	0.1128	BetweenCol	Focal
789	03_10	09_43	0309	0.3033	BetweenCol	Focal
790	03_10	09_44	0309	-0.4532	BetweenCol	Focal
791	03_10	11_45	0311	0.0906	BetweenCol	Focal
792	03_10	26_46	0326	-0.0237	BetweenCol	Focal
793	03_10	26_47	0326	-0.363	BetweenCol	Focal
794	03_10	26_48	0326	-0.8161	BetweenCol	Focal
795	03_10	29_49	0329	-1.9018	BetweenCol	Focal
796	03_10	30_50	0330	-1.871	BetweenCol	Focal
797	03_10	30_51	0330	-0.4466	BetweenCol	Focal
798	03_10	30_52	0330	0.5675	BetweenCol	Focal
799	03_10	30_53	0330	-1.066	BetweenCol	Focal
800	03_10	31_54	0331	0.6782	BetweenCol	Focal
801	03_10	31_55	0331	0.5909	BetweenCol	Focal
802	03_10	32_56	0332	0.471	BetweenCol	Focal
803	03_10	32_57	0332	0.1879	BetweenCol	Focal
804	03_10	32_58	0332	0.1879	BetweenCol	Focal
805	03_10	33_59	0333	0.149	BetweenCol	Focal
806	03_10	33_60	0333	0.3033	BetweenCol	Focal
807	03_10	35_61	0335	-0.363	BetweenCol	Focal
808	03_10	36_62	0336	-0.6008	BetweenCol	Focal
809	03_10	36_63	0336	-0.5333	BetweenCol	Focal
810	03_10	37_64	0337	-0.401	BetweenCol	Focal
811	03_10	37_65	0337	-0.0399	BetweenCol	Focal
812	03_10	38_66	0338	-0.0967	BetweenCol	Focal
813	03_10	39_67	0339	-0.4532	BetweenCol	Focal
814	03_10	40_68	0340	-0.113	BetweenCol	Focal
815	03_10	40_69	0340	-0.444	BetweenCol	Focal
816	03_10	D1_70	03D1	0.7661	BetweenCol	BetweenPop
817	03_10	D1_71	03D1	0.5675	BetweenCol	BetweenPop
818	03_10	DY_72	03DY	0.471	BetweenCol	BetweenPop
819	03_10	D3_73	03D3	0.6012	BetweenCol	BetweenPop
820	03_10	D2_74	03D2	-0.9431	BetweenCol	BetweenPop
821	03_10	D2_75	03D2	-0.8283	BetweenCol	BetweenPop
822	03_10	D6_76	03D6	-0.1409	BetweenCol	BetweenPop
823	03_10	D4_77	03D4	1	BetweenCol	BetweenPop
824	03_10	D5_78	03D5	-0.3996	BetweenCol	BetweenPop
825	03_10	D4_79	03D4	1	BetweenCol	BetweenPop
826	03_10	D4_80	03D4	1	BetweenCol	BetweenPop
827	03_10	D5_81	03D5	-0.5303	BetweenCol	BetweenPop
828	03_10	DZ_82	03DZ	-0.5303	BetweenCol	BetweenPop
829	03_10	DZ_83	03DZ	-0.3336	BetweenCol	BetweenPop
830	03_10	DY_84	03DY	0.5099	BetweenCol	BetweenPop
831	03_10	D3_85	03D3	0.1	BetweenCol	BetweenPop
832	03_10	D3_86	03D3	0.3555	BetweenCol	BetweenPop
833	03_10	D3_87	03D3	1	BetweenCol	BetweenPop
834	03_10	D3_88	03D3	0.771	BetweenCol	BetweenPop
835	03_10	01_89	0301	0.5909	BetweenCol	Focal
836	03_11	04_12	0304	0.7761	BetweenCol	Focal
837	03_11	04_13	0304	0.7761	BetweenCol	Focal
838	03_11	05_14	0305	0.1341	BetweenCol	Focal
839	03_11	05_15	0305	0.0074	BetweenCol	Focal
840	03_11	06_16	0306	-1.9018	BetweenCol	Focal
841	03_11	06_17	0306	-0.1053	BetweenCol	Focal
842	03_11	06_18	0306	0.5675	BetweenCol	Focal
843	03_11	06_19	0306	-0.0967	BetweenCol	Focal
844	03_11	07_20	0307	0.05	BetweenCol	Focal
845	03_11	08_21	0308	0.6782	BetweenCol	Focal
846	03_11	08_22	0308	-0.1128	BetweenCol	Focal
847	03_11	09_23	0309	-0.0716	BetweenCol	Focal
848	03_11	09_24	0309	-0.0371	BetweenCol	Focal
849	03_11	10_25	0310	-0.1218	BetweenCol	Focal
850	03_11	10_26	0310	0.1341	BetweenCol	Focal
851	03_11	11_27	0311	0.1424	BetweenCol	Focal
852	03_11	12_28	0312	0.2796	BetweenCol	Focal
853	03_11	12_29	0312	-0.1409	BetweenCol	Focal
854	03_11	03_30	0303	0.5847	WithinCol	Focal
855	03_11	03_31	0303	0.5847	WithinCol	Focal
856	03_11	03_32	0303	0.1341	WithinCol	Focal
857	03_11	03_33	0303	0.8173	WithinCol	Focal
858	03_11	03_34	0303	0.1341	WithinCol	Focal
859	03_11	03_35	0303	-0.0967	WithinCol	Focal
860	03_11	03_36	0303	0.7897	WithinCol	Focal
861	03_11	05_37	0305	-0.3331	BetweenCol	Focal
862	03_11	05_38	0305	-0.4143	BetweenCol	Focal
863	03_11	06_39	0306	-0.7998	BetweenCol	Focal
864	03_11	06_40	0306	-0.8083	BetweenCol	Focal
865	03_11	08_41	0308	0.3033	BetweenCol	Focal
866	03_11	08_42	0308	0.1128	BetweenCol	Focal
867	03_11	09_43	0309	0.3033	BetweenCol	Focal
868	03_11	09_44	0309	-0.4532	BetweenCol	Focal
869	03_11	11_45	0311	0.0906	BetweenCol	Focal
870	03_11	26_46	0326	-0.0237	BetweenCol	Focal
871	03_11	26_47	0326	-0.363	BetweenCol	Focal
872	03_11	26_48	0326	-0.8161	BetweenCol	Focal
873	03_11	29_49	0329	-1.9018	BetweenCol	Focal
874	03_11	30_50	0330	-1.871	BetweenCol	Focal
875	03_11	30_51	0330	-0.4466	BetweenCol	Focal
876	03_11	30_52	0330	0.5675	BetweenCol	Focal
877	03_11	30_53	0330	-1.066	BetweenCol	Focal
878	03_11	31_54	0331	0.6782	BetweenCol	Focal
879	03_11	31_55	0331	0.5909	BetweenCol	Focal
880	03_11	32_56	0332	0.471	BetweenCol	Focal
881	03_11	32_57	0332	0.1879	BetweenCol	Focal
882	03_11	32_58	0332	0.1879	BetweenCol	Focal
883	03_11	33_59	0333	0.149	BetweenCol	Focal
884	03_11	33_60	0333	0.3033	BetweenCol	Focal
885	03_11	35_61	0335	-0.363	BetweenCol	Focal
886	03_11	36_62	0336	-0.6008	BetweenCol	Focal
887	03_11	36_63	0336	-0.5333	BetweenCol	Focal
888	03_11	37_64	0337	-0.401	BetweenCol	Focal
889	03_11	37_65	0337	-0.0399	BetweenCol	Focal
890	03_11	38_66	0338	-0.0967	BetweenCol	Focal
891	03_11	39_67	0339	-0.4532	BetweenCol	Focal
892	03_11	40_68	0340	-0.113	BetweenCol	Focal
893	03_11	40_69	0340	-0.444	BetweenCol	Focal
894	03_11	D1_70	03D1	0.7661	BetweenCol	BetweenPop
895	03_11	D1_71	03D1	0.5675	BetweenCol	BetweenPop
896	03_11	DY_72	03DY	0.471	BetweenCol	BetweenPop
897	03_11	D3_73	03D3	0.6012	BetweenCol	BetweenPop
898	03_11	D2_74	03D2	-0.9431	BetweenCol	BetweenPop
899	03_11	D2_75	03D2	-0.8283	BetweenCol	BetweenPop
900	03_11	D6_76	03D6	-0.1409	BetweenCol	BetweenPop
901	03_11	D4_77	03D4	1	BetweenCol	BetweenPop
902	03_11	D5_78	03D5	-0.3996	BetweenCol	BetweenPop
903	03_11	D4_79	03D4	1	BetweenCol	BetweenPop
904	03_11	D4_80	03D4	1	BetweenCol	BetweenPop
905	03_11	D5_81	03D5	-0.5303	BetweenCol	BetweenPop
906	03_11	DZ_82	03DZ	-0.5303	BetweenCol	BetweenPop
907	03_11	DZ_83	03DZ	-0.3336	BetweenCol	BetweenPop
908	03_11	DY_84	03DY	0.5099	BetweenCol	BetweenPop
909	03_11	D3_85	03D3	0.1	BetweenCol	BetweenPop
910	03_11	D3_86	03D3	0.3555	BetweenCol	BetweenPop
911	03_11	D3_87	03D3	1	BetweenCol	BetweenPop
912	03_11	D3_88	03D3	0.771	BetweenCol	BetweenPop
913	03_11	01_89	0301	0.5909	BetweenCol	Focal
914	04_12	04_13	0404	1	WithinCol	Focal
915	04_12	05_14	0405	-0.1729	BetweenCol	Focal
916	04_12	05_15	0405	0.0074	BetweenCol	Focal
917	04_12	06_16	0406	-1.9018	BetweenCol	Focal
918	04_12	06_17	0406	-0.2579	BetweenCol	Focal
919	04_12	06_18	0406	0.2435	BetweenCol	Focal
920	04_12	06_19	0406	-0.0037	BetweenCol	Focal
921	04_12	07_20	0407	0.1997	BetweenCol	Focal
922	04_12	08_21	0408	0.1833	BetweenCol	Focal
923	04_12	08_22	0408	-0.1128	BetweenCol	Focal
924	04_12	09_23	0409	-0.4972	BetweenCol	Focal
925	04_12	09_24	0409	0.4148	BetweenCol	Focal
926	04_12	10_25	0410	0.4735	BetweenCol	Focal
927	04_12	10_26	0410	-0.1729	BetweenCol	Focal
928	04_12	11_27	0411	-0.4087	BetweenCol	Focal
929	04_12	12_28	0412	-0.1409	BetweenCol	Focal
930	04_12	12_29	0412	-0.0535	BetweenCol	Focal
931	04_12	03_30	0403	0.7594	BetweenCol	Focal
932	04_12	03_31	0403	0.7594	BetweenCol	Focal
933	04_12	03_32	0403	-0.1729	BetweenCol	Focal
934	04_12	03_33	0403	0.5847	BetweenCol	Focal
935	04_12	03_34	0403	-0.1729	BetweenCol	Focal
936	04_12	03_35	0403	-0.0037	BetweenCol	Focal
937	04_12	03_36	0403	0.5117	BetweenCol	Focal
938	04_12	05_37	0405	-0.7079	BetweenCol	Focal
939	04_12	05_38	0405	-1.6471	BetweenCol	Focal
940	04_12	06_39	0406	-1.1666	BetweenCol	Focal
941	04_12	06_40	0406	-0.8475	BetweenCol	Focal
942	04_12	08_41	0408	-0.0967	BetweenCol	Focal
943	04_12	08_42	0408	-0.1468	BetweenCol	Focal
944	04_12	09_43	0409	-0.0967	BetweenCol	Focal
945	04_12	09_44	0409	-0.6833	BetweenCol	Focal
946	04_12	11_45	0411	0.2426	BetweenCol	Focal
947	04_12	26_46	0426	-0.3204	BetweenCol	Focal
948	04_12	26_47	0426	-0.3457	BetweenCol	Focal
949	04_12	26_48	0426	-0.8617	BetweenCol	Focal
950	04_12	29_49	0429	-1.9018	BetweenCol	Focal
951	04_12	30_50	0430	-1.871	BetweenCol	Focal
952	04_12	30_51	0430	-0.2316	BetweenCol	Focal
953	04_12	30_52	0430	0.2435	BetweenCol	Focal
954	04_12	30_53	0430	-0.913	BetweenCol	Focal
955	04_12	31_54	0431	0.1833	BetweenCol	Focal
956	04_12	31_55	0431	0.5272	BetweenCol	Focal
957	04_12	32_56	0432	0.3594	BetweenCol	Focal
958	04_12	32_57	0432	0.6363	BetweenCol	Focal
959	04_12	32_58	0432	0.6363	BetweenCol	Focal
960	04_12	33_59	0433	0.7526	BetweenCol	Focal
961	04_12	33_60	0433	-0.0967	BetweenCol	Focal
962	04_12	35_61	0435	-0.3457	BetweenCol	Focal
963	04_12	36_62	0436	-0.6117	BetweenCol	Focal
964	04_12	36_63	0436	-0.9212	BetweenCol	Focal
965	04_12	37_64	0437	-0.8442	BetweenCol	Focal
966	04_12	37_65	0437	-0.5684	BetweenCol	Focal
967	04_12	38_66	0438	-0.0037	BetweenCol	Focal
968	04_12	39_67	0439	-0.6833	BetweenCol	Focal
969	04_12	40_68	0440	-0.022	BetweenCol	Focal
970	04_12	40_69	0440	0.0451	BetweenCol	Focal
971	04_12	D1_70	04D1	0.4471	BetweenCol	BetweenPop
972	04_12	D1_71	04D1	0.2435	BetweenCol	BetweenPop
973	04_12	DY_72	04DY	0.3594	BetweenCol	BetweenPop
974	04_12	D3_73	04D3	0.3113	BetweenCol	BetweenPop
975	04_12	D2_74	04D2	-0.6984	BetweenCol	BetweenPop
976	04_12	D2_75	04D2	-0.8283	BetweenCol	BetweenPop
977	04_12	D6_76	04D6	-0.0535	BetweenCol	BetweenPop
978	04_12	D4_77	04D4	0.7761	BetweenCol	BetweenPop
979	04_12	D5_78	04D5	-0.0296	BetweenCol	BetweenPop
980	04_12	D4_79	04D4	0.7761	BetweenCol	BetweenPop
981	04_12	D4_80	04D4	0.7761	BetweenCol	BetweenPop
982	04_12	D5_81	04D5	-0.2262	BetweenCol	BetweenPop
983	04_12	DZ_82	04DZ	-0.2262	BetweenCol	BetweenPop
984	04_12	DZ_83	04DZ	0.2189	BetweenCol	BetweenPop
985	04_12	DY_84	04DY	0.4156	BetweenCol	BetweenPop
986	04_12	D3_85	04D3	-0.3206	BetweenCol	BetweenPop
987	04_12	D3_86	04D3	0.0988	BetweenCol	BetweenPop
988	04_12	D3_87	04D3	0.7023	BetweenCol	BetweenPop
989	04_12	D3_88	04D3	0.4605	BetweenCol	BetweenPop
990	04_12	01_89	0401	0.5272	BetweenCol	Focal
991	04_13	05_14	0405	-0.1729	BetweenCol	Focal
992	04_13	05_15	0405	0.0074	BetweenCol	Focal
993	04_13	06_16	0406	-1.9018	BetweenCol	Focal
994	04_13	06_17	0406	-0.2579	BetweenCol	Focal
995	04_13	06_18	0406	0.2435	BetweenCol	Focal
996	04_13	06_19	0406	-0.0037	BetweenCol	Focal
997	04_13	07_20	0407	0.1997	BetweenCol	Focal
998	04_13	08_21	0408	0.1833	BetweenCol	Focal
999	04_13	08_22	0408	-0.1128	BetweenCol	Focal
1000	04_13	09_23	0409	-0.4972	BetweenCol	Focal
1001	04_13	09_24	0409	0.4148	BetweenCol	Focal
1002	04_13	10_25	0410	0.4735	BetweenCol	Focal
1003	04_13	10_26	0410	-0.1729	BetweenCol	Focal
1004	04_13	11_27	0411	-0.4087	BetweenCol	Focal
1005	04_13	12_28	0412	-0.1409	BetweenCol	Focal
1006	04_13	12_29	0412	-0.0535	BetweenCol	Focal
1007	04_13	03_30	0403	0.7594	BetweenCol	Focal
1008	04_13	03_31	0403	0.7594	BetweenCol	Focal
1009	04_13	03_32	0403	-0.1729	BetweenCol	Focal
1010	04_13	03_33	0403	0.5847	BetweenCol	Focal
1011	04_13	03_34	0403	-0.1729	BetweenCol	Focal
1012	04_13	03_35	0403	-0.0037	BetweenCol	Focal
1013	04_13	03_36	0403	0.5117	BetweenCol	Focal
1014	04_13	05_37	0405	-0.7079	BetweenCol	Focal
1015	04_13	05_38	0405	-1.6471	BetweenCol	Focal
1016	04_13	06_39	0406	-1.1666	BetweenCol	Focal
1017	04_13	06_40	0406	-0.8475	BetweenCol	Focal
1018	04_13	08_41	0408	-0.0967	BetweenCol	Focal
1019	04_13	08_42	0408	-0.1468	BetweenCol	Focal
1020	04_13	09_43	0409	-0.0967	BetweenCol	Focal
1021	04_13	09_44	0409	-0.6833	BetweenCol	Focal
1022	04_13	11_45	0411	0.2426	BetweenCol	Focal
1023	04_13	26_46	0426	-0.3204	BetweenCol	Focal
1024	04_13	26_47	0426	-0.3457	BetweenCol	Focal
1025	04_13	26_48	0426	-0.8617	BetweenCol	Focal
1026	04_13	29_49	0429	-1.9018	BetweenCol	Focal
1027	04_13	30_50	0430	-1.871	BetweenCol	Focal
1028	04_13	30_51	0430	-0.2316	BetweenCol	Focal
1029	04_13	30_52	0430	0.2435	BetweenCol	Focal
1030	04_13	30_53	0430	-0.913	BetweenCol	Focal
1031	04_13	31_54	0431	0.1833	BetweenCol	Focal
1032	04_13	31_55	0431	0.5272	BetweenCol	Focal
1033	04_13	32_56	0432	0.3594	BetweenCol	Focal
1034	04_13	32_57	0432	0.6363	BetweenCol	Focal
1035	04_13	32_58	0432	0.6363	BetweenCol	Focal
1036	04_13	33_59	0433	0.7526	BetweenCol	Focal
1037	04_13	33_60	0433	-0.0967	BetweenCol	Focal
1038	04_13	35_61	0435	-0.3457	BetweenCol	Focal
1039	04_13	36_62	0436	-0.6117	BetweenCol	Focal
1040	04_13	36_63	0436	-0.9212	BetweenCol	Focal
1041	04_13	37_64	0437	-0.8442	BetweenCol	Focal
1042	04_13	37_65	0437	-0.5684	BetweenCol	Focal
1043	04_13	38_66	0438	-0.0037	BetweenCol	Focal
1044	04_13	39_67	0439	-0.6833	BetweenCol	Focal
1045	04_13	40_68	0440	-0.022	BetweenCol	Focal
1046	04_13	40_69	0440	0.0451	BetweenCol	Focal
1047	04_13	D1_70	04D1	0.4471	BetweenCol	BetweenPop
1048	04_13	D1_71	04D1	0.2435	BetweenCol	BetweenPop
1049	04_13	DY_72	04DY	0.3594	BetweenCol	BetweenPop
1050	04_13	D3_73	04D3	0.3113	BetweenCol	BetweenPop
1051	04_13	D2_74	04D2	-0.6984	BetweenCol	BetweenPop
1052	04_13	D2_75	04D2	-0.8283	BetweenCol	BetweenPop
1053	04_13	D6_76	04D6	-0.0535	BetweenCol	BetweenPop
1054	04_13	D4_77	04D4	0.7761	BetweenCol	BetweenPop
1055	04_13	D5_78	04D5	-0.0296	BetweenCol	BetweenPop
1056	04_13	D4_79	04D4	0.7761	BetweenCol	BetweenPop
1057	04_13	D4_80	04D4	0.7761	BetweenCol	BetweenPop
1058	04_13	D5_81	04D5	-0.2262	BetweenCol	BetweenPop
1059	04_13	DZ_82	04DZ	-0.2262	BetweenCol	BetweenPop
1060	04_13	DZ_83	04DZ	0.2189	BetweenCol	BetweenPop
1061	04_13	DY_84	04DY	0.4156	BetweenCol	BetweenPop
1062	04_13	D3_85	04D3	-0.3206	BetweenCol	BetweenPop
1063	04_13	D3_86	04D3	0.0988	BetweenCol	BetweenPop
1064	04_13	D3_87	04D3	0.7023	BetweenCol	BetweenPop
1065	04_13	D3_88	04D3	0.4605	BetweenCol	BetweenPop
1066	04_13	01_89	0401	0.5272	BetweenCol	Focal
1067	05_14	05_15	0505	1	WithinCol	Focal
1068	05_14	06_16	0506	0.0362	BetweenCol	Focal
1069	05_14	06_17	0506	-0.4811	BetweenCol	Focal
1070	05_14	06_18	0506	0.8103	BetweenCol	Focal
1071	05_14	06_19	0506	0.3016	BetweenCol	Focal
1072	05_14	07_20	0507	-0.051	BetweenCol	Focal
1073	05_14	08_21	0508	0.4213	BetweenCol	Focal
1074	05_14	08_22	0508	0.5339	BetweenCol	Focal
1075	05_14	09_23	0509	1	BetweenCol	Focal
1076	05_14	09_24	0509	-0.3989	BetweenCol	Focal
1077	05_14	10_25	0510	0.1676	BetweenCol	Focal
1078	05_14	10_26	0510	1	BetweenCol	Focal
1079	05_14	11_27	0511	0.0353	BetweenCol	Focal
1080	05_14	12_28	0512	0.5845	BetweenCol	Focal
1081	05_14	12_29	0512	0.2779	BetweenCol	Focal
1082	05_14	03_30	0503	0.0849	BetweenCol	Focal
1083	05_14	03_31	0503	0.0849	BetweenCol	Focal
1084	05_14	03_32	0503	1	BetweenCol	Focal
1085	05_14	03_33	0503	0.3467	BetweenCol	Focal
1086	05_14	03_34	0503	1	BetweenCol	Focal
1087	05_14	03_35	0503	0.3016	BetweenCol	Focal
1088	05_14	03_36	0503	-0.1106	BetweenCol	Focal
1089	05_14	05_37	0505	-0.3703	WithinCol	Focal
1090	05_14	05_38	0505	-0.7022	WithinCol	Focal
1091	05_14	06_39	0506	-0.3222	BetweenCol	Focal
1092	05_14	06_40	0506	-0.133	BetweenCol	Focal
1093	05_14	08_41	0508	0.5963	BetweenCol	Focal
1094	05_14	08_42	0508	0.8651	BetweenCol	Focal
1095	05_14	09_43	0509	0.5963	BetweenCol	Focal
1096	05_14	09_44	0509	0.6341	BetweenCol	Focal
1097	05_14	11_45	0511	-0.0133	BetweenCol	Focal
1098	05_14	26_46	0526	0.4412	BetweenCol	Focal
1099	05_14	26_47	0526	0.4484	BetweenCol	Focal
1100	05_14	26_48	0526	-0.7844	BetweenCol	Focal
1101	05_14	29_49	0529	0.0362	BetweenCol	Focal
1102	05_14	30_50	0530	1	BetweenCol	Focal
1103	05_14	30_51	0530	0.5144	BetweenCol	Focal
1104	05_14	30_52	0530	0.8103	BetweenCol	Focal
1105	05_14	30_53	0530	0.089	BetweenCol	Focal
1106	05_14	31_54	0531	0.4213	BetweenCol	Focal
1107	05_14	31_55	0531	0.097	BetweenCol	Focal
1108	05_14	32_56	0532	-0.129	BetweenCol	Focal
1109	05_14	32_57	0532	-0.1756	BetweenCol	Focal
1110	05_14	32_58	0532	-0.1756	BetweenCol	Focal
1111	05_14	33_59	0533	-0.6826	BetweenCol	Focal
1112	05_14	33_60	0533	0.5963	BetweenCol	Focal
1113	05_14	35_61	0535	0.4484	BetweenCol	Focal
1114	05_14	36_62	0536	-0.2758	BetweenCol	Focal
1115	05_14	36_63	0536	-0.0232	BetweenCol	Focal
1116	05_14	37_64	0537	0.6457	BetweenCol	Focal
1117	05_14	37_65	0537	0.3326	BetweenCol	Focal
1118	05_14	38_66	0538	0.3016	BetweenCol	Focal
1119	05_14	39_67	0539	0.6341	BetweenCol	Focal
1120	05_14	40_68	0540	0.2928	BetweenCol	Focal
1121	05_14	40_69	0540	-0.0917	BetweenCol	Focal
1122	05_14	D1_70	05D1	0.5938	BetweenCol	BetweenPop
1123	05_14	D1_71	05D1	0.8103	BetweenCol	BetweenPop
1124	05_14	DY_72	05DY	-0.129	BetweenCol	BetweenPop
1125	05_14	D3_73	05D3	0.1171	BetweenCol	BetweenPop
1126	05_14	D2_74	05D2	-0.4115	BetweenCol	BetweenPop
1127	05_14	D2_75	05D2	-0.0578	BetweenCol	BetweenPop
1128	05_14	D6_76	05D6	0.2779	BetweenCol	BetweenPop
1129	05_14	D4_77	05D4	0.1341	BetweenCol	BetweenPop
1130	05_14	D5_78	05D5	-0.4216	BetweenCol	BetweenPop
1131	05_14	D4_79	05D4	0.1341	BetweenCol	BetweenPop
1132	05_14	D4_80	05D4	0.1341	BetweenCol	BetweenPop
1133	05_14	D5_81	05D5	-0.0943	BetweenCol	BetweenPop
1134	05_14	DZ_82	05DZ	-0.0943	BetweenCol	BetweenPop
1135	05_14	DZ_83	05DZ	-0.3599	BetweenCol	BetweenPop
1136	05_14	DY_84	05DY	-0.4802	BetweenCol	BetweenPop
1137	05_14	D3_85	05D3	0.0183	BetweenCol	BetweenPop
1138	05_14	D3_86	05D3	-0.3129	BetweenCol	BetweenPop
1139	05_14	D3_87	05D3	-0.0716	BetweenCol	BetweenPop
1140	05_14	D3_88	05D3	0.2023	BetweenCol	BetweenPop
1141	05_14	01_89	0501	0.097	BetweenCol	Focal
1142	05_15	06_16	0506	0.0362	BetweenCol	Focal
1143	05_15	06_17	0506	-0.3318	BetweenCol	Focal
1144	05_15	06_18	0506	1	BetweenCol	Focal
1145	05_15	06_19	0506	0.0362	BetweenCol	Focal
1146	05_15	07_20	0507	0.0074	BetweenCol	Focal
1147	05_15	08_21	0508	-1.9018	BetweenCol	Focal
1148	05_15	08_22	0508	0.0362	BetweenCol	Focal
1149	05_15	09_23	0509	1	BetweenCol	Focal
1150	05_15	09_24	0509	1	BetweenCol	Focal
1151	05_15	10_25	0510	1	BetweenCol	Focal
1152	05_15	10_26	0510	1	BetweenCol	Focal
1153	05_15	11_27	0511	-1.9018	BetweenCol	Focal
1154	05_15	12_28	0512	1	BetweenCol	Focal
1155	05_15	12_29	0512	1	BetweenCol	Focal
1156	05_15	03_30	0503	1	BetweenCol	Focal
1157	05_15	03_31	0503	1	BetweenCol	Focal
1158	05_15	03_32	0503	1	BetweenCol	Focal
1159	05_15	03_33	0503	1	BetweenCol	Focal
1160	05_15	03_34	0503	1	BetweenCol	Focal
1161	05_15	03_35	0503	0.0362	BetweenCol	Focal
1162	05_15	03_36	0503	0.0074	BetweenCol	Focal
1163	05_15	05_37	0505	-1.9018	WithinCol	Focal
1164	05_15	05_38	0505	-1.9018	WithinCol	Focal
1165	05_15	06_39	0506	0.0362	BetweenCol	Focal
1166	05_15	06_40	0506	-1.9018	BetweenCol	Focal
1167	05_15	08_41	0508	0.0362	BetweenCol	Focal
1168	05_15	08_42	0508	0.5734	BetweenCol	Focal
1169	05_15	09_43	0509	0.0362	BetweenCol	Focal
1170	05_15	09_44	0509	1	BetweenCol	Focal
1171	05_15	11_45	0511	-1.9018	BetweenCol	Focal
1172	05_15	26_46	0526	1	BetweenCol	Focal
1173	05_15	26_47	0526	1	BetweenCol	Focal
1174	05_15	26_48	0526	-1.9018	BetweenCol	Focal
1175	05_15	29_49	0529	0.0362	BetweenCol	Focal
1176	05_15	30_50	0530	1	BetweenCol	Focal
1177	05_15	30_51	0530	1	BetweenCol	Focal
1178	05_15	30_52	0530	1	BetweenCol	Focal
1179	05_15	30_53	0530	0.0362	BetweenCol	Focal
1180	05_15	31_54	0531	-1.9018	BetweenCol	Focal
1181	05_15	31_55	0531	1	BetweenCol	Focal
1182	05_15	32_56	0532	1	BetweenCol	Focal
1183	05_15	32_57	0532	1	BetweenCol	Focal
1184	05_15	32_58	0532	1	BetweenCol	Focal
1185	05_15	33_59	0533	0.0074	BetweenCol	Focal
1186	05_15	33_60	0533	0.0362	BetweenCol	Focal
1187	05_15	35_61	0535	1	BetweenCol	Focal
1188	05_15	36_62	0536	1	BetweenCol	Focal
1189	05_15	36_63	0536	0.0362	BetweenCol	Focal
1190	05_15	37_64	0537	0.0362	BetweenCol	Focal
1191	05_15	37_65	0537	0.0362	BetweenCol	Focal
1192	05_15	38_66	0538	0.0362	BetweenCol	Focal
1193	05_15	39_67	0539	1	BetweenCol	Focal
1194	05_15	40_68	0540	1	BetweenCol	Focal
1195	05_15	40_69	0540	1	BetweenCol	Focal
1196	05_15	D1_70	05D1	0.0074	BetweenCol	BetweenPop
1197	05_15	D1_71	05D1	1	BetweenCol	BetweenPop
1198	05_15	DY_72	05DY	1	BetweenCol	BetweenPop
1199	05_15	D3_73	05D3	1	BetweenCol	BetweenPop
1200	05_15	D2_74	05D2	0.0362	BetweenCol	BetweenPop
1201	05_15	D2_75	05D2	0.0362	BetweenCol	BetweenPop
1202	05_15	D6_76	05D6	1	BetweenCol	BetweenPop
1203	05_15	D4_77	05D4	0.0074	BetweenCol	BetweenPop
1204	05_15	D5_78	05D5	0.0074	BetweenCol	BetweenPop
1205	05_15	D4_79	05D4	0.0074	BetweenCol	BetweenPop
1206	05_15	D4_80	05D4	0.0074	BetweenCol	BetweenPop
1207	05_15	D5_81	05D5	1	BetweenCol	BetweenPop
1208	05_15	DZ_82	05DZ	1	BetweenCol	BetweenPop
1209	05_15	DZ_83	05DZ	0.0074	BetweenCol	BetweenPop
1210	05_15	DY_84	05DY	0.0074	BetweenCol	BetweenPop
1211	05_15	D3_85	05D3	0.0074	BetweenCol	BetweenPop
1212	05_15	D3_86	05D3	0.0074	BetweenCol	BetweenPop
1213	05_15	D3_87	05D3	0.0074	BetweenCol	BetweenPop
1214	05_15	D3_88	05D3	1	BetweenCol	BetweenPop
1215	05_15	01_89	0501	1	BetweenCol	Focal
1216	06_16	06_17	0606	-0.1172	WithinCol	Focal
1217	06_16	06_18	0606	0.0362	WithinCol	Focal
1218	06_16	06_19	0606	1	WithinCol	Focal
1219	06_16	07_20	0607	-1.9018	BetweenCol	Focal
1220	06_16	08_21	0608	-1.6951	BetweenCol	Focal
1221	06_16	08_22	0608	1	BetweenCol	Focal
1222	06_16	09_23	0609	0.0362	BetweenCol	Focal
1223	06_16	09_24	0609	0.0362	BetweenCol	Focal
1224	06_16	10_25	0610	0.0362	BetweenCol	Focal
1225	06_16	10_26	0610	0.0362	BetweenCol	Focal
1226	06_16	11_27	0611	-1.6951	BetweenCol	Focal
1227	06_16	12_28	0612	0.0362	BetweenCol	Focal
1228	06_16	12_29	0612	0.0362	BetweenCol	Focal
1229	06_16	03_30	0603	0.0362	BetweenCol	Focal
1230	06_16	03_31	0603	0.0362	BetweenCol	Focal
1231	06_16	03_32	0603	0.0362	BetweenCol	Focal
1232	06_16	03_33	0603	0.0362	BetweenCol	Focal
1233	06_16	03_34	0603	0.0362	BetweenCol	Focal
1234	06_16	03_35	0603	1	BetweenCol	Focal
1235	06_16	03_36	0603	-1.9018	BetweenCol	Focal
1236	06_16	05_37	0605	-1.6951	BetweenCol	Focal
1237	06_16	05_38	0605	-1.6951	BetweenCol	Focal
1238	06_16	06_39	0606	1	WithinCol	Focal
1239	06_16	06_40	0606	-1.6951	WithinCol	Focal
1240	06_16	08_41	0608	1	BetweenCol	Focal
1241	06_16	08_42	0608	0.0129	BetweenCol	Focal
1242	06_16	09_43	0609	1	BetweenCol	Focal
1243	06_16	09_44	0609	0.0362	BetweenCol	Focal
1244	06_16	11_45	0611	-1.6951	BetweenCol	Focal
1245	06_16	26_46	0626	0.0362	BetweenCol	Focal
1246	06_16	26_47	0626	0.0362	BetweenCol	Focal
1247	06_16	26_48	0626	-1.6951	BetweenCol	Focal
1248	06_16	29_49	0629	1	BetweenCol	Focal
1249	06_16	30_50	0630	1	BetweenCol	Focal
1250	06_16	30_51	0630	0.0362	BetweenCol	Focal
1251	06_16	30_52	0630	0.0362	BetweenCol	Focal
1252	06_16	30_53	0630	1	BetweenCol	Focal
1253	06_16	31_54	0631	-1.6951	BetweenCol	Focal
1254	06_16	31_55	0631	0.0362	BetweenCol	Focal
1255	06_16	32_56	0632	0.0362	BetweenCol	Focal
1256	06_16	32_57	0632	0.0362	BetweenCol	Focal
1257	06_16	32_58	0632	0.0362	BetweenCol	Focal
1258	06_16	33_59	0633	-1.9018	BetweenCol	Focal
1259	06_16	33_60	0633	1	BetweenCol	Focal
1260	06_16	35_61	0635	0.0362	BetweenCol	Focal
1261	06_16	36_62	0636	0.0362	BetweenCol	Focal
1262	06_16	36_63	0636	1	BetweenCol	Focal
1263	06_16	37_64	0637	1	BetweenCol	Focal
1264	06_16	37_65	0637	1	BetweenCol	Focal
1265	06_16	38_66	0638	1	BetweenCol	Focal
1266	06_16	39_67	0639	0.0362	BetweenCol	Focal
1267	06_16	40_68	0640	0.0362	BetweenCol	Focal
1268	06_16	40_69	0640	0.0362	BetweenCol	Focal
1269	06_16	D1_70	06D1	-1.9018	BetweenCol	BetweenPop
1270	06_16	D1_71	06D1	0.0362	BetweenCol	BetweenPop
1271	06_16	DY_72	06DY	0.0362	BetweenCol	BetweenPop
1272	06_16	D3_73	06D3	0.0362	BetweenCol	BetweenPop
1273	06_16	D2_74	06D2	1	BetweenCol	BetweenPop
1274	06_16	D2_75	06D2	1	BetweenCol	BetweenPop
1275	06_16	D6_76	06D6	0.0362	BetweenCol	BetweenPop
1276	06_16	D4_77	06D4	-1.9018	BetweenCol	BetweenPop
1277	06_16	D5_78	06D5	-1.9018	BetweenCol	BetweenPop
1278	06_16	D4_79	06D4	-1.9018	BetweenCol	BetweenPop
1279	06_16	D4_80	06D4	-1.9018	BetweenCol	BetweenPop
1280	06_16	D5_81	06D5	0.0362	BetweenCol	BetweenPop
1281	06_16	DZ_82	06DZ	0.0362	BetweenCol	BetweenPop
1282	06_16	DZ_83	06DZ	-1.9018	BetweenCol	BetweenPop
1283	06_16	DY_84	06DY	-1.9018	BetweenCol	BetweenPop
1284	06_16	D3_85	06D3	-1.9018	BetweenCol	BetweenPop
1285	06_16	D3_86	06D3	-1.9018	BetweenCol	BetweenPop
1286	06_16	D3_87	06D3	-1.9018	BetweenCol	BetweenPop
1287	06_16	D3_88	06D3	0.0362	BetweenCol	BetweenPop
1288	06_16	01_89	0601	0.0362	BetweenCol	Focal
1289	06_17	06_18	0606	-0.2179	WithinCol	Focal
1290	06_17	06_19	0606	-0.2659	WithinCol	Focal
1291	06_17	07_20	0607	-0.7858	BetweenCol	Focal
1292	06_17	08_21	0608	-0.4662	BetweenCol	Focal
1293	06_17	08_22	0608	-0.1172	BetweenCol	Focal
1294	06_17	09_23	0609	-0.4811	BetweenCol	Focal
1295	06_17	09_24	0609	-0.0837	BetweenCol	Focal
1296	06_17	10_25	0610	-0.4707	BetweenCol	Focal
1297	06_17	10_26	0610	-0.4811	BetweenCol	Focal
1298	06_17	11_27	0611	-0.4084	BetweenCol	Focal
1299	06_17	12_28	0612	-0.2179	BetweenCol	Focal
1300	06_17	12_29	0612	-0.4058	BetweenCol	Focal
1301	06_17	03_30	0603	0.0231	BetweenCol	Focal
1302	06_17	03_31	0603	0.0231	BetweenCol	Focal
1303	06_17	03_32	0603	-0.4811	BetweenCol	Focal
1304	06_17	03_33	0603	0.1344	BetweenCol	Focal
1305	06_17	03_34	0603	-0.4811	BetweenCol	Focal
1306	06_17	03_35	0603	-0.2659	BetweenCol	Focal
1307	06_17	03_36	0603	-0.1053	BetweenCol	Focal
1308	06_17	05_37	0605	-0.3606	BetweenCol	Focal
1309	06_17	05_38	0605	-0.4161	BetweenCol	Focal
1310	06_17	06_39	0606	0.0057	WithinCol	Focal
1311	06_17	06_40	0606	-0.8941	WithinCol	Focal
1312	06_17	08_41	0608	-0.085	BetweenCol	Focal
1313	06_17	08_42	0608	-0.4154	BetweenCol	Focal
1314	06_17	09_43	0609	-0.085	BetweenCol	Focal
1315	06_17	09_44	0609	-0.4569	BetweenCol	Focal
1316	06_17	11_45	0611	-0.6659	BetweenCol	Focal
1317	06_17	26_46	0626	-0.1517	BetweenCol	Focal
1318	06_17	26_47	0626	-0.3032	BetweenCol	Focal
1319	06_17	26_48	0626	-0.1789	BetweenCol	Focal
1320	06_17	29_49	0629	-0.1172	BetweenCol	Focal
1321	06_17	30_50	0630	1	BetweenCol	Focal
1322	06_17	30_51	0630	-0.543	BetweenCol	Focal
1323	06_17	30_52	0630	-0.2179	BetweenCol	Focal
1324	06_17	30_53	0630	-0.4507	BetweenCol	Focal
1325	06_17	31_54	0631	-0.4662	BetweenCol	Focal
1326	06_17	31_55	0631	0.2295	BetweenCol	Focal
1327	06_17	32_56	0632	0.2295	BetweenCol	Focal
1328	06_17	32_57	0632	-0.0837	BetweenCol	Focal
1329	06_17	32_58	0632	-0.0837	BetweenCol	Focal
1330	06_17	33_59	0633	-0.3091	BetweenCol	Focal
1331	06_17	33_60	0633	-0.085	BetweenCol	Focal
1332	06_17	35_61	0635	-0.3032	BetweenCol	Focal
1333	06_17	36_62	0636	-0.0424	BetweenCol	Focal
1334	06_17	36_63	0636	0.0057	BetweenCol	Focal
1335	06_17	37_64	0637	-0.3893	BetweenCol	Focal
1336	06_17	37_65	0637	-0.085	BetweenCol	Focal
1337	06_17	38_66	0638	-0.2659	BetweenCol	Focal
1338	06_17	39_67	0639	-0.4569	BetweenCol	Focal
1339	06_17	40_68	0640	-0.4058	BetweenCol	Focal
1340	06_17	40_69	0640	-0.4261	BetweenCol	Focal
1341	06_17	D1_70	06D1	-0.529	BetweenCol	BetweenPop
1342	06_17	D1_71	06D1	-0.2179	BetweenCol	BetweenPop
1343	06_17	DY_72	06DY	0.2295	BetweenCol	BetweenPop
1344	06_17	D3_73	06D3	0.1344	BetweenCol	BetweenPop
1345	06_17	D2_74	06D2	-0.1456	BetweenCol	BetweenPop
1346	06_17	D2_75	06D2	-0.1315	BetweenCol	BetweenPop
1347	06_17	D6_76	06D6	-0.4058	BetweenCol	BetweenPop
1348	06_17	D4_77	06D4	-0.1053	BetweenCol	BetweenPop
1349	06_17	D5_78	06D5	-0.615	BetweenCol	BetweenPop
1350	06_17	D4_79	06D4	-0.1053	BetweenCol	BetweenPop
1351	06_17	D4_80	06D4	-0.1053	BetweenCol	BetweenPop
1352	06_17	D5_81	06D5	-0.2813	BetweenCol	BetweenPop
1353	06_17	DZ_82	06DZ	-0.2813	BetweenCol	BetweenPop
1354	06_17	DZ_83	06DZ	-0.7106	BetweenCol	BetweenPop
1355	06_17	DY_84	06DY	-0.0324	BetweenCol	BetweenPop
1356	06_17	D3_85	06D3	-0.529	BetweenCol	BetweenPop
1357	06_17	D3_86	06D3	-0.1053	BetweenCol	BetweenPop
1358	06_17	D3_87	06D3	-0.1053	BetweenCol	BetweenPop
1359	06_17	D3_88	06D3	0.1344	BetweenCol	BetweenPop
1360	06_17	01_89	0601	0.2295	BetweenCol	Focal
1361	06_18	06_19	0606	0.3642	WithinCol	Focal
1362	06_18	07_20	0607	-0.1295	BetweenCol	Focal
1363	06_18	08_21	0608	0.4213	BetweenCol	Focal
1364	06_18	08_22	0608	0.5339	BetweenCol	Focal
1365	06_18	09_23	0609	0.7599	BetweenCol	Focal
1366	06_18	09_24	0609	-0.1356	BetweenCol	Focal
1367	06_18	10_25	0610	0.1676	BetweenCol	Focal
1368	06_18	10_26	0610	0.8103	BetweenCol	Focal
1369	06_18	11_27	0611	-0.0012	BetweenCol	Focal
1370	06_18	12_28	0612	0.727	BetweenCol	Focal
1371	06_18	12_29	0612	0.3343	BetweenCol	Focal
1372	06_18	03_30	0603	0.5364	BetweenCol	Focal
1373	06_18	03_31	0603	0.5364	BetweenCol	Focal
1374	06_18	03_32	0603	0.8103	BetweenCol	Focal
1375	06_18	03_33	0603	0.7989	BetweenCol	Focal
1376	06_18	03_34	0603	0.8103	BetweenCol	Focal
1377	06_18	03_35	0603	0.3642	BetweenCol	Focal
1378	06_18	03_36	0603	0.2945	BetweenCol	Focal
1379	06_18	05_37	0605	-0.6007	BetweenCol	Focal
1380	06_18	05_38	0605	-0.7022	BetweenCol	Focal
1381	06_18	06_39	0606	-0.4759	WithinCol	Focal
1382	06_18	06_40	0606	-0.591	WithinCol	Focal
1383	06_18	08_41	0608	0.7371	BetweenCol	Focal
1384	06_18	08_42	0608	0.6806	BetweenCol	Focal
1385	06_18	09_43	0609	0.7371	BetweenCol	Focal
1386	06_18	09_44	0609	0.3048	BetweenCol	Focal
1387	06_18	11_45	0611	-0.0725	BetweenCol	Focal
1388	06_18	26_46	0626	0.5883	BetweenCol	Focal
1389	06_18	26_47	0626	0.1805	BetweenCol	Focal
1390	06_18	26_48	0626	-1.0206	BetweenCol	Focal
1391	06_18	29_49	0629	0.0362	BetweenCol	Focal
1392	06_18	30_50	0630	1	BetweenCol	Focal
1393	06_18	30_51	0630	0.2045	BetweenCol	Focal
1394	06_18	30_52	0630	1	BetweenCol	Focal
1395	06_18	30_53	0630	-0.3829	BetweenCol	Focal
1396	06_18	31_54	0631	0.4213	BetweenCol	Focal
1397	06_18	31_55	0631	0.5441	BetweenCol	Focal
1398	06_18	32_56	0632	0.39	BetweenCol	Focal
1399	06_18	32_57	0632	0.1159	BetweenCol	Focal
1400	06_18	32_58	0632	0.1159	BetweenCol	Focal
1401	06_18	33_59	0633	-0.429	BetweenCol	Focal
1402	06_18	33_60	0633	0.7371	BetweenCol	Focal
1403	06_18	35_61	0635	0.1805	BetweenCol	Focal
1404	06_18	36_62	0636	-0.367	BetweenCol	Focal
1405	06_18	36_63	0636	-0.0872	BetweenCol	Focal
1406	06_18	37_64	0637	0.3326	BetweenCol	Focal
1407	06_18	37_65	0637	0.402	BetweenCol	Focal
1408	06_18	38_66	0638	0.3642	BetweenCol	Focal
1409	06_18	39_67	0639	0.3048	BetweenCol	Focal
1410	06_18	40_68	0640	0.3532	BetweenCol	Focal
1411	06_18	40_69	0640	-0.1505	BetweenCol	Focal
1412	06_18	D1_70	06D1	0.735	BetweenCol	BetweenPop
1413	06_18	D1_71	06D1	1	BetweenCol	BetweenPop
1414	06_18	DY_72	06DY	0.39	BetweenCol	BetweenPop
1415	06_18	D3_73	06D3	0.5568	BetweenCol	BetweenPop
1416	06_18	D2_74	06D2	-0.6125	BetweenCol	BetweenPop
1417	06_18	D2_75	06D2	-0.1861	BetweenCol	BetweenPop
1418	06_18	D6_76	06D6	0.3343	BetweenCol	BetweenPop
1419	06_18	D4_77	06D4	0.5675	BetweenCol	BetweenPop
1420	06_18	D5_78	06D5	-0.6283	BetweenCol	BetweenPop
1421	06_18	D4_79	06D4	0.5675	BetweenCol	BetweenPop
1422	06_18	D4_80	06D4	0.5675	BetweenCol	BetweenPop
1423	06_18	D5_81	06D5	-0.1699	BetweenCol	BetweenPop
1424	06_18	DZ_82	06DZ	-0.1699	BetweenCol	BetweenPop
1425	06_18	DZ_83	06DZ	-0.5009	BetweenCol	BetweenPop
1426	06_18	DY_84	06DY	-0.1176	BetweenCol	BetweenPop
1427	06_18	D3_85	06D3	-0.0145	BetweenCol	BetweenPop
1428	06_18	D3_86	06D3	-0.0517	BetweenCol	BetweenPop
1429	06_18	D3_87	06D3	0.4312	BetweenCol	BetweenPop
1430	06_18	D3_88	06D3	0.7412	BetweenCol	BetweenPop
1431	06_18	01_89	0601	0.5441	BetweenCol	Focal
1432	06_19	07_20	0607	-0.7864	BetweenCol	Focal
1433	06_19	08_21	0608	0.1933	BetweenCol	Focal
1434	06_19	08_22	0608	1	BetweenCol	Focal
1435	06_19	09_23	0609	0.0588	BetweenCol	Focal
1436	06_19	09_24	0609	0.0713	BetweenCol	Focal
1437	06_19	10_25	0610	0.4776	BetweenCol	Focal
1438	06_19	10_26	0610	0.3016	BetweenCol	Focal
1439	06_19	11_27	0611	-0.4854	BetweenCol	Focal
1440	06_19	12_28	0612	-0.1168	BetweenCol	Focal
1441	06_19	12_29	0612	0.0136	BetweenCol	Focal
1442	06_19	03_30	0603	0.4007	BetweenCol	Focal
1443	06_19	03_31	0603	0.4007	BetweenCol	Focal
1444	06_19	03_32	0603	0.3016	BetweenCol	Focal
1445	06_19	03_33	0603	0.2492	BetweenCol	Focal
1446	06_19	03_34	0603	0.3016	BetweenCol	Focal
1447	06_19	03_35	0603	1	BetweenCol	Focal
1448	06_19	03_36	0603	-0.5264	BetweenCol	Focal
1449	06_19	05_37	0605	-0.9709	BetweenCol	Focal
1450	06_19	05_38	0605	-1.5456	BetweenCol	Focal
1451	06_19	06_39	0606	-0.6591	WithinCol	Focal
1452	06_19	06_40	0606	-0.4809	WithinCol	Focal
1453	06_19	08_41	0608	0.6463	BetweenCol	Focal
1454	06_19	08_42	0608	0.243	BetweenCol	Focal
1455	06_19	09_43	0609	0.6463	BetweenCol	Focal
1456	06_19	09_44	0609	-0.1981	BetweenCol	Focal
1457	06_19	11_45	0611	0.4507	BetweenCol	Focal
1458	06_19	26_46	0626	-0.3772	BetweenCol	Focal
1459	06_19	26_47	0626	0.0244	BetweenCol	Focal
1460	06_19	26_48	0626	-1.013	BetweenCol	Focal
1461	06_19	29_49	0629	1	BetweenCol	Focal
1462	06_19	30_50	0630	1	BetweenCol	Focal
1463	06_19	30_51	0630	0.2596	BetweenCol	Focal
1464	06_19	30_52	0630	0.3642	BetweenCol	Focal
1465	06_19	30_53	0630	0.1077	BetweenCol	Focal
1466	06_19	31_54	0631	0.1933	BetweenCol	Focal
1467	06_19	31_55	0631	0.1203	BetweenCol	Focal
1468	06_19	32_56	0632	-0.3031	BetweenCol	Focal
1469	06_19	32_57	0632	0.3588	BetweenCol	Focal
1470	06_19	32_58	0632	0.3588	BetweenCol	Focal
1471	06_19	33_59	0633	-0.2414	BetweenCol	Focal
1472	06_19	33_60	0633	0.6463	BetweenCol	Focal
1473	06_19	35_61	0635	0.0244	BetweenCol	Focal
1474	06_19	36_62	0636	-0.6893	BetweenCol	Focal
1475	06_19	36_63	0636	-0.1219	BetweenCol	Focal
1476	06_19	37_64	0637	0.1472	BetweenCol	Focal
1477	06_19	37_65	0637	0.1554	BetweenCol	Focal
1478	06_19	38_66	0638	1	BetweenCol	Focal
1479	06_19	39_67	0639	-0.1981	BetweenCol	Focal
1480	06_19	40_68	0640	0.0546	BetweenCol	Focal
1481	06_19	40_69	0640	0.1096	BetweenCol	Focal
1482	06_19	D1_70	06D1	-0.0725	BetweenCol	BetweenPop
1483	06_19	D1_71	06D1	0.3642	BetweenCol	BetweenPop
1484	06_19	DY_72	06DY	-0.3031	BetweenCol	BetweenPop
1485	06_19	D3_73	06D3	-0.1312	BetweenCol	BetweenPop
1486	06_19	D2_74	06D2	0.0584	BetweenCol	BetweenPop
1487	06_19	D2_75	06D2	0.269	BetweenCol	BetweenPop
1488	06_19	D6_76	06D6	0.0136	BetweenCol	BetweenPop
1489	06_19	D4_77	06D4	-0.0967	BetweenCol	BetweenPop
1490	06_19	D5_78	06D5	-0.9102	BetweenCol	BetweenPop
1491	06_19	D4_79	06D4	-0.0967	BetweenCol	BetweenPop
1492	06_19	D4_80	06D4	-0.0967	BetweenCol	BetweenPop
1493	06_19	D5_81	06D5	-0.2284	BetweenCol	BetweenPop
1494	06_19	DZ_82	06DZ	-0.2284	BetweenCol	BetweenPop
1495	06_19	DZ_83	06DZ	-0.3242	BetweenCol	BetweenPop
1496	06_19	DY_84	06DY	-0.9212	BetweenCol	BetweenPop
1497	06_19	D3_85	06D3	-1.0228	BetweenCol	BetweenPop
1498	06_19	D3_86	06D3	-0.6919	BetweenCol	BetweenPop
1499	06_19	D3_87	06D3	-0.5753	BetweenCol	BetweenPop
1500	06_19	D3_88	06D3	-0.0389	BetweenCol	BetweenPop
1501	06_19	01_89	0601	0.1203	BetweenCol	Focal
1502	07_20	08_21	0708	-0.5079	BetweenCol	Focal
1503	07_20	08_22	0708	-1.2424	BetweenCol	Focal
1504	07_20	09_23	0709	0.0499	BetweenCol	Focal
1505	07_20	09_24	0709	-0.0478	BetweenCol	Focal
1506	07_20	10_25	0710	0.1015	BetweenCol	Focal
1507	07_20	10_26	0710	-0.051	BetweenCol	Focal
1508	07_20	11_27	0711	-0.3071	BetweenCol	Focal
1509	07_20	12_28	0712	0.0895	BetweenCol	Focal
1510	07_20	12_29	0712	0.3498	BetweenCol	Focal
1511	07_20	03_30	0703	-0.0535	BetweenCol	Focal
1512	07_20	03_31	0703	-0.0535	BetweenCol	Focal
1513	07_20	03_32	0703	-0.051	BetweenCol	Focal
1514	07_20	03_33	0703	-0.1409	BetweenCol	Focal
1515	07_20	03_34	0703	-0.051	BetweenCol	Focal
1516	07_20	03_35	0703	-0.7864	BetweenCol	Focal
1517	07_20	03_36	0703	-0.0768	BetweenCol	Focal
1518	07_20	05_37	0705	-1.9054	BetweenCol	Focal
1519	07_20	05_38	0705	-1.6471	BetweenCol	Focal
1520	07_20	06_39	0706	-1.0818	BetweenCol	Focal
1521	07_20	06_40	0706	0.1578	BetweenCol	Focal
1522	07_20	08_41	0708	-0.711	BetweenCol	Focal
1523	07_20	08_42	0708	-0.0428	BetweenCol	Focal
1524	07_20	09_43	0709	-0.711	BetweenCol	Focal
1525	07_20	09_44	0709	-0.404	BetweenCol	Focal
1526	07_20	11_45	0711	-0.5026	BetweenCol	Focal
1527	07_20	26_46	0726	-0.4064	BetweenCol	Focal
1528	07_20	26_47	0726	-0.2944	BetweenCol	Focal
1529	07_20	26_48	0726	-0.6735	BetweenCol	Focal
1530	07_20	29_49	0729	-1.9018	BetweenCol	Focal
1531	07_20	30_50	0730	-1.871	BetweenCol	Focal
1532	07_20	30_51	0730	-0.1229	BetweenCol	Focal
1533	07_20	30_52	0730	-0.1295	BetweenCol	Focal
1534	07_20	30_53	0730	-0.7407	BetweenCol	Focal
1535	07_20	31_54	0731	-0.5079	BetweenCol	Focal
1536	07_20	31_55	0731	-0.3695	BetweenCol	Focal
1537	07_20	32_56	0732	-0.3204	BetweenCol	Focal
1538	07_20	32_57	0732	0.0451	BetweenCol	Focal
1539	07_20	32_58	0732	0.0451	BetweenCol	Focal
1540	07_20	33_59	0733	0.3734	BetweenCol	Focal
1541	07_20	33_60	0733	-0.711	BetweenCol	Focal
1542	07_20	35_61	0735	-0.2944	BetweenCol	Focal
1543	07_20	36_62	0736	-0.3683	BetweenCol	Focal
1544	07_20	36_63	0736	-1.3201	BetweenCol	Focal
1545	07_20	37_64	0737	-0.3208	BetweenCol	Focal
1546	07_20	37_65	0737	-0.5971	BetweenCol	Focal
1547	07_20	38_66	0738	-0.7864	BetweenCol	Focal
1548	07_20	39_67	0739	-0.404	BetweenCol	Focal
1549	07_20	40_68	0740	-0.2301	BetweenCol	Focal
1550	07_20	40_69	0740	0.3054	BetweenCol	Focal
1551	07_20	D1_70	07D1	0.1334	BetweenCol	BetweenPop
1552	07_20	D1_71	07D1	-0.1295	BetweenCol	BetweenPop
1553	07_20	DY_72	07DY	-0.3204	BetweenCol	BetweenPop
1554	07_20	D3_73	07D3	0.0153	BetweenCol	BetweenPop
1555	07_20	D2_74	07D2	-0.8354	BetweenCol	BetweenPop
1556	07_20	D2_75	07D2	-1.2768	BetweenCol	BetweenPop
1557	07_20	D6_76	07D6	0.3498	BetweenCol	BetweenPop
1558	07_20	D4_77	07D4	0.05	BetweenCol	BetweenPop
1559	07_20	D5_78	07D5	0.3767	BetweenCol	BetweenPop
1560	07_20	D4_79	07D4	0.05	BetweenCol	BetweenPop
1561	07_20	D4_80	07D4	0.05	BetweenCol	BetweenPop
1562	07_20	D5_81	07D5	-0.0242	BetweenCol	BetweenPop
1563	07_20	DZ_82	07DZ	-0.0242	BetweenCol	BetweenPop
1564	07_20	DZ_83	07DZ	0.6049	BetweenCol	BetweenPop
1565	07_20	DY_84	07DY	0.0534	BetweenCol	BetweenPop
1566	07_20	D3_85	07D3	0.1925	BetweenCol	BetweenPop
1567	07_20	D3_86	07D3	0.2923	BetweenCol	BetweenPop
1568	07_20	D3_87	07D3	0.2029	BetweenCol	BetweenPop
1569	07_20	D3_88	07D3	-0.0499	BetweenCol	BetweenPop
1570	07_20	01_89	0701	-0.3695	BetweenCol	Focal
1571	08_21	08_22	0808	0.3239	WithinCol	Focal
1572	08_21	09_23	0809	0.1481	BetweenCol	Focal
1573	08_21	09_24	0809	-0.8582	BetweenCol	Focal
1574	08_21	10_25	0810	-0.4497	BetweenCol	Focal
1575	08_21	10_26	0810	0.4213	BetweenCol	Focal
1576	08_21	11_27	0811	0.5708	BetweenCol	Focal
1577	08_21	12_28	0812	-0.0012	BetweenCol	Focal
1578	08_21	12_29	0812	-0.711	BetweenCol	Focal
1579	08_21	03_30	0803	-0.0725	BetweenCol	Focal
1580	08_21	03_31	0803	-0.0725	BetweenCol	Focal
1581	08_21	03_32	0803	0.4213	BetweenCol	Focal
1582	08_21	03_33	0803	0.4213	BetweenCol	Focal
1583	08_21	03_34	0803	0.4213	BetweenCol	Focal
1584	08_21	03_35	0803	0.1933	BetweenCol	Focal
1585	08_21	03_36	0803	0.269	BetweenCol	Focal
1586	08_21	05_37	0805	-0.0915	BetweenCol	Focal
1587	08_21	05_38	0805	0.0875	BetweenCol	Focal
1588	08_21	06_39	0806	-0.8374	BetweenCol	Focal
1589	08_21	06_40	0806	-0.5567	BetweenCol	Focal
1590	08_21	08_41	0808	0.6813	WithinCol	Focal
1591	08_21	08_42	0808	0.325	WithinCol	Focal
1592	08_21	09_43	0809	0.6813	BetweenCol	Focal
1593	08_21	09_44	0809	-0.6007	BetweenCol	Focal
1594	08_21	11_45	0811	0.5307	BetweenCol	Focal
1595	08_21	26_46	0826	-0.7022	BetweenCol	Focal
1596	08_21	26_47	0826	-0.4002	BetweenCol	Focal
1597	08_21	26_48	0826	-0.8482	BetweenCol	Focal
1598	08_21	29_49	0829	-1.6951	BetweenCol	Focal
1599	08_21	30_50	0830	-1.871	BetweenCol	Focal
1600	08_21	30_51	0830	-0.5567	BetweenCol	Focal
1601	08_21	30_52	0830	0.4213	BetweenCol	Focal
1602	08_21	30_53	0830	-0.9824	BetweenCol	Focal
1603	08_21	31_54	0831	1	BetweenCol	Focal
1604	08_21	31_55	0831	-0.0451	BetweenCol	Focal
1605	08_21	32_56	0832	-0.7022	BetweenCol	Focal
1606	08_21	32_57	0832	-0.4497	BetweenCol	Focal
1607	08_21	32_58	0832	-0.4497	BetweenCol	Focal
1608	08_21	33_59	0833	-0.864	BetweenCol	Focal
1609	08_21	33_60	0833	0.6813	BetweenCol	Focal
1610	08_21	35_61	0835	-0.4002	BetweenCol	Focal
1611	08_21	36_62	0836	-1.0206	BetweenCol	Focal
1612	08_21	36_63	0836	-0.4334	BetweenCol	Focal
1613	08_21	37_64	0837	0.2532	BetweenCol	Focal
1614	08_21	37_65	0837	0.2532	BetweenCol	Focal
1615	08_21	38_66	0838	0.1933	BetweenCol	Focal
1616	08_21	39_67	0839	-0.6007	BetweenCol	Focal
1617	08_21	40_68	0840	-0.649	BetweenCol	Focal
1618	08_21	40_69	0840	-0.9025	BetweenCol	Focal
1619	08_21	D1_70	08D1	0.6782	BetweenCol	BetweenPop
1620	08_21	D1_71	08D1	0.4213	BetweenCol	BetweenPop
1621	08_21	DY_72	08DY	-0.7022	BetweenCol	BetweenPop
1622	08_21	D3_73	08D3	-0.0012	BetweenCol	BetweenPop
1623	08_21	D2_74	08D2	-1.054	BetweenCol	BetweenPop
1624	08_21	D2_75	08D2	-0.9614	BetweenCol	BetweenPop
1625	08_21	D6_76	08D6	-0.711	BetweenCol	BetweenPop
1626	08_21	D4_77	08D4	0.6782	BetweenCol	BetweenPop
1627	08_21	D5_78	08D5	-1.0797	BetweenCol	BetweenPop
1628	08_21	D4_79	08D4	0.6782	BetweenCol	BetweenPop
1629	08_21	D4_80	08D4	0.6782	BetweenCol	BetweenPop
1630	08_21	D5_81	08D5	-1.1798	BetweenCol	BetweenPop
1631	08_21	DZ_82	08DZ	-1.1798	BetweenCol	BetweenPop
1632	08_21	DZ_83	08DZ	-0.8012	BetweenCol	BetweenPop
1633	08_21	DY_84	08DY	-0.4544	BetweenCol	BetweenPop
1634	08_21	D3_85	08D3	-0.2208	BetweenCol	BetweenPop
1635	08_21	D3_86	08D3	-0.1937	BetweenCol	BetweenPop
1636	08_21	D3_87	08D3	0.4999	BetweenCol	BetweenPop
1637	08_21	D3_88	08D3	0.1481	BetweenCol	BetweenPop
1638	08_21	01_89	0801	-0.0451	BetweenCol	Focal
1639	08_22	09_23	0809	0.0362	BetweenCol	Focal
1640	08_22	09_24	0809	-0.1274	BetweenCol	Focal
1641	08_22	10_25	0810	0.5339	BetweenCol	Focal
1642	08_22	10_26	0810	0.5339	BetweenCol	Focal
1643	08_22	11_27	0811	-0.9614	BetweenCol	Focal
1644	08_22	12_28	0812	-0.1861	BetweenCol	Focal
1645	08_22	12_29	0812	-0.1861	BetweenCol	Focal
1646	08_22	03_30	0803	0.5339	BetweenCol	Focal
1647	08_22	03_31	0803	0.5339	BetweenCol	Focal
1648	08_22	03_32	0803	0.5339	BetweenCol	Focal
1649	08_22	03_33	0803	0.5339	BetweenCol	Focal
1650	08_22	03_34	0803	0.5339	BetweenCol	Focal
1651	08_22	03_35	0803	1	BetweenCol	Focal
1652	08_22	03_36	0803	-1.1042	BetweenCol	Focal
1653	08_22	05_37	0805	-0.8058	BetweenCol	Focal
1654	08_22	05_38	0805	-1.6951	BetweenCol	Focal
1655	08_22	06_39	0806	-0.5027	BetweenCol	Focal
1656	08_22	06_40	0806	-0.9529	BetweenCol	Focal
1657	08_22	08_41	0808	1	WithinCol	Focal
1658	08_22	08_42	0808	0.3619	WithinCol	Focal
1659	08_22	09_43	0809	1	BetweenCol	Focal
1660	08_22	09_44	0809	-0.1274	BetweenCol	Focal
1661	08_22	11_45	0811	0.3239	BetweenCol	Focal
1662	08_22	26_46	0826	0.0362	BetweenCol	Focal
1663	08_22	26_47	0826	0.5339	BetweenCol	Focal
1664	08_22	26_48	0826	-1.4271	BetweenCol	Focal
1665	08_22	29_49	0829	1	BetweenCol	Focal
1666	08_22	30_50	0830	1	BetweenCol	Focal
1667	08_22	30_51	0830	0.5339	BetweenCol	Focal
1668	08_22	30_52	0830	0.5339	BetweenCol	Focal
1669	08_22	30_53	0830	0.3131	BetweenCol	Focal
1670	08_22	31_54	0831	0.3239	BetweenCol	Focal
1671	08_22	31_55	0831	0.5339	BetweenCol	Focal
1672	08_22	32_56	0832	0.0362	BetweenCol	Focal
1673	08_22	32_57	0832	0.5339	BetweenCol	Focal
1674	08_22	32_58	0832	0.5339	BetweenCol	Focal
1675	08_22	33_59	0833	-1.9018	BetweenCol	Focal
1676	08_22	33_60	0833	1	BetweenCol	Focal
1677	08_22	35_61	0835	0.5339	BetweenCol	Focal
1678	08_22	36_62	0836	-0.7282	BetweenCol	Focal
1679	08_22	36_63	0836	0.269	BetweenCol	Focal
1680	08_22	37_64	0837	0.269	BetweenCol	Focal
1681	08_22	37_65	0837	0.269	BetweenCol	Focal
1682	08_22	38_66	0838	1	BetweenCol	Focal
1683	08_22	39_67	0839	-0.1274	BetweenCol	Focal
1684	08_22	40_68	0840	-0.1274	BetweenCol	Focal
1685	08_22	40_69	0840	-0.1861	BetweenCol	Focal
1686	08_22	D1_70	08D1	-0.1128	BetweenCol	BetweenPop
1687	08_22	D1_71	08D1	0.5339	BetweenCol	BetweenPop
1688	08_22	DY_72	08DY	0.0362	BetweenCol	BetweenPop
1689	08_22	D3_73	08D3	-0.1861	BetweenCol	BetweenPop
1690	08_22	D2_74	08D2	0.269	BetweenCol	BetweenPop
1691	08_22	D2_75	08D2	0.269	BetweenCol	BetweenPop
1692	08_22	D6_76	08D6	-0.1861	BetweenCol	BetweenPop
1693	08_22	D4_77	08D4	-0.1128	BetweenCol	BetweenPop
1694	08_22	D5_78	08D5	-1.2424	BetweenCol	BetweenPop
1695	08_22	D4_79	08D4	-0.1128	BetweenCol	BetweenPop
1696	08_22	D4_80	08D4	-0.1128	BetweenCol	BetweenPop
1697	08_22	D5_81	08D5	-0.1861	BetweenCol	BetweenPop
1698	08_22	DZ_82	08DZ	-0.1861	BetweenCol	BetweenPop
1699	08_22	DZ_83	08DZ	-1.2424	BetweenCol	BetweenPop
1700	08_22	DY_84	08DY	-1.2424	BetweenCol	BetweenPop
1701	08_22	D3_85	08D3	-1.5429	BetweenCol	BetweenPop
1702	08_22	D3_86	08D3	-1.0845	BetweenCol	BetweenPop
1703	08_22	D3_87	08D3	-1.9018	BetweenCol	BetweenPop
1704	08_22	D3_88	08D3	0.0362	BetweenCol	BetweenPop
1705	08_22	01_89	0801	0.5339	BetweenCol	Focal
1706	09_23	09_24	0909	-0.4042	WithinCol	Focal
1707	09_23	10_25	0910	-0.0819	BetweenCol	Focal
1708	09_23	10_26	0910	1	BetweenCol	Focal
1709	09_23	11_27	0911	0.1423	BetweenCol	Focal
1710	09_23	12_28	0912	0.7599	BetweenCol	Focal
1711	09_23	12_29	0912	0.4295	BetweenCol	Focal
1712	09_23	03_30	0903	-0.1479	BetweenCol	Focal
1713	09_23	03_31	0903	-0.1479	BetweenCol	Focal
1714	09_23	03_32	0903	1	BetweenCol	Focal
1715	09_23	03_33	0903	0.2023	BetweenCol	Focal
1716	09_23	03_34	0903	1	BetweenCol	Focal
1717	09_23	03_35	0903	0.0588	BetweenCol	Focal
1718	09_23	03_36	0903	-0.0716	BetweenCol	Focal
1719	09_23	05_37	0905	-0.3734	BetweenCol	Focal
1720	09_23	05_38	0905	-0.7022	BetweenCol	Focal
1721	09_23	06_39	0906	0.08	BetweenCol	Focal
1722	09_23	06_40	0906	0.248	BetweenCol	Focal
1723	09_23	08_41	0908	0.48	BetweenCol	Focal
1724	09_23	08_42	0908	0.8413	BetweenCol	Focal
1725	09_23	09_43	0909	0.48	WithinCol	Focal
1726	09_23	09_44	0909	0.7885	WithinCol	Focal
1727	09_23	11_45	0911	-0.4088	BetweenCol	Focal
1728	09_23	26_46	0926	0.4412	BetweenCol	Focal
1729	09_23	26_47	0926	0.3489	BetweenCol	Focal
1730	09_23	26_48	0926	-0.6177	BetweenCol	Focal
1731	09_23	29_49	0929	0.0362	BetweenCol	Focal
1732	09_23	30_50	0930	1	BetweenCol	Focal
1733	09_23	30_51	0930	0.4083	BetweenCol	Focal
1734	09_23	30_52	0930	0.7599	BetweenCol	Focal
1735	09_23	30_53	0930	0.1583	BetweenCol	Focal
1736	09_23	31_54	0931	0.1481	BetweenCol	Focal
1737	09_23	31_55	0931	-0.129	BetweenCol	Focal
1738	09_23	32_56	0932	-0.129	BetweenCol	Focal
1739	09_23	32_57	0932	-0.4042	BetweenCol	Focal
1740	09_23	32_58	0932	-0.4042	BetweenCol	Focal
1741	09_23	33_59	0933	-0.6826	BetweenCol	Focal
1742	09_23	33_60	0933	0.48	BetweenCol	Focal
1743	09_23	35_61	0935	0.3489	BetweenCol	Focal
1744	09_23	36_62	0936	-0.0013	BetweenCol	Focal
1745	09_23	36_63	0936	0.08	BetweenCol	Focal
1746	09_23	37_64	0937	0.7998	BetweenCol	Focal
1747	09_23	37_65	0937	0.48	BetweenCol	Focal
1748	09_23	38_66	0938	0.0588	BetweenCol	Focal
1749	09_23	39_67	0939	0.7885	BetweenCol	Focal
1750	09_23	40_68	0940	0.4295	BetweenCol	Focal
1751	09_23	40_69	0940	-0.0315	BetweenCol	Focal
1752	09_23	D1_70	09D1	0.4759	BetweenCol	BetweenPop
1753	09_23	D1_71	09D1	0.7599	BetweenCol	BetweenPop
1754	09_23	DY_72	09DY	-0.129	BetweenCol	BetweenPop
1755	09_23	D3_73	09D3	0.2023	BetweenCol	BetweenPop
1756	09_23	D2_74	09D2	-0.3881	BetweenCol	BetweenPop
1757	09_23	D2_75	09D2	0.0857	BetweenCol	BetweenPop
1758	09_23	D6_76	09D6	0.4295	BetweenCol	BetweenPop
1759	09_23	D4_77	09D4	-0.0716	BetweenCol	BetweenPop
1760	09_23	D5_78	09D5	-0.3998	BetweenCol	BetweenPop
1761	09_23	D4_79	09D4	-0.0716	BetweenCol	BetweenPop
1762	09_23	D4_80	09D4	-0.0716	BetweenCol	BetweenPop
1763	09_23	D5_81	09D5	-0.0203	BetweenCol	BetweenPop
1764	09_23	DZ_82	09DZ	-0.0203	BetweenCol	BetweenPop
1765	09_23	DZ_83	09DZ	-0.3337	BetweenCol	BetweenPop
1766	09_23	DY_84	09DY	-0.4704	BetweenCol	BetweenPop
1767	09_23	D3_85	09D3	0.4759	BetweenCol	BetweenPop
1768	09_23	D3_86	09D3	-0.0716	BetweenCol	BetweenPop
1769	09_23	D3_87	09D3	-0.0716	BetweenCol	BetweenPop
1770	09_23	D3_88	09D3	0.2023	BetweenCol	BetweenPop
1771	09_23	01_89	0901	-0.129	BetweenCol	Focal
1772	09_24	10_25	0910	0.8046	BetweenCol	Focal
1773	09_24	10_26	0910	-0.3989	BetweenCol	Focal
1774	09_24	11_27	0911	-0.9241	BetweenCol	Focal
1775	09_24	12_28	0912	-0.2437	BetweenCol	Focal
1776	09_24	12_29	0912	0.2798	BetweenCol	Focal
1777	09_24	03_30	0903	0.6347	BetweenCol	Focal
1778	09_24	03_31	0903	0.6347	BetweenCol	Focal
1779	09_24	03_32	0903	-0.3989	BetweenCol	Focal
1780	09_24	03_33	0903	0.1848	BetweenCol	Focal
1781	09_24	03_34	0903	-0.3989	BetweenCol	Focal
1782	09_24	03_35	0903	0.0713	BetweenCol	Focal
1783	09_24	03_36	0903	0.0764	BetweenCol	Focal
1784	09_24	05_37	0905	-0.6393	BetweenCol	Focal
1785	09_24	05_38	0905	-1.0447	BetweenCol	Focal
1786	09_24	06_39	0906	-0.319	BetweenCol	Focal
1787	09_24	06_40	0906	-0.6156	BetweenCol	Focal
1788	09_24	08_41	0908	-0.4097	BetweenCol	Focal
1789	09_24	08_42	0908	-0.3473	BetweenCol	Focal
1790	09_24	09_43	0909	-0.4097	WithinCol	Focal
1791	09_24	09_44	0909	-0.2781	WithinCol	Focal
1792	09_24	11_45	0911	-0.2631	BetweenCol	Focal
1793	09_24	26_46	0926	-0.0096	BetweenCol	Focal
1794	09_24	26_47	0926	-0.2392	BetweenCol	Focal
1795	09_24	26_48	0926	-0.4247	BetweenCol	Focal
1796	09_24	29_49	0929	0.0362	BetweenCol	Focal
1797	09_24	30_50	0930	1	BetweenCol	Focal
1798	09_24	30_51	0930	0.0307	BetweenCol	Focal
1799	09_24	30_52	0930	-0.1356	BetweenCol	Focal
1800	09_24	30_53	0930	-0.0909	BetweenCol	Focal
1801	09_24	31_54	0931	-0.8582	BetweenCol	Focal
1802	09_24	31_55	0931	0.2791	BetweenCol	Focal
1803	09_24	32_56	0932	0.3765	BetweenCol	Focal
1804	09_24	32_57	0932	0.8533	BetweenCol	Focal
1805	09_24	32_58	0932	0.8533	BetweenCol	Focal
1806	09_24	33_59	0933	0.8255	BetweenCol	Focal
1807	09_24	33_60	0933	-0.4097	BetweenCol	Focal
1808	09_24	35_61	0935	-0.2392	BetweenCol	Focal
1809	09_24	36_62	0936	0.0449	BetweenCol	Focal
1810	09_24	36_63	0936	-0.5304	BetweenCol	Focal
1811	09_24	37_64	0937	-0.768	BetweenCol	Focal
1812	09_24	37_65	0937	-0.5535	BetweenCol	Focal
1813	09_24	38_66	0938	0.0713	BetweenCol	Focal
1814	09_24	39_67	0939	-0.2781	BetweenCol	Focal
1815	09_24	40_68	0940	0.5298	BetweenCol	Focal
1816	09_24	40_69	0940	0.6368	BetweenCol	Focal
1817	09_24	D1_70	09D1	-0.4183	BetweenCol	BetweenPop
1818	09_24	D1_71	09D1	-0.1356	BetweenCol	BetweenPop
1819	09_24	DY_72	09DY	0.3765	BetweenCol	BetweenPop
1820	09_24	D3_73	09D3	0.1188	BetweenCol	BetweenPop
1821	09_24	D2_74	09D2	0.0615	BetweenCol	BetweenPop
1822	09_24	D2_75	09D2	-0.386	BetweenCol	BetweenPop
1823	09_24	D6_76	09D6	0.2798	BetweenCol	BetweenPop
1824	09_24	D4_77	09D4	-0.0371	BetweenCol	BetweenPop
1825	09_24	D5_78	09D5	0.0548	BetweenCol	BetweenPop
1826	09_24	D4_79	09D4	-0.0371	BetweenCol	BetweenPop
1827	09_24	D4_80	09D4	-0.0371	BetweenCol	BetweenPop
1828	09_24	D5_81	09D5	0.345	BetweenCol	BetweenPop
1829	09_24	DZ_82	09DZ	0.345	BetweenCol	BetweenPop
1830	09_24	DZ_83	09DZ	0.4185	BetweenCol	BetweenPop
1831	09_24	DY_84	09DY	-0.0547	BetweenCol	BetweenPop
1832	09_24	D3_85	09D3	-0.3714	BetweenCol	BetweenPop
1833	09_24	D3_86	09D3	-0.1651	BetweenCol	BetweenPop
1834	09_24	D3_87	09D3	0.0097	BetweenCol	BetweenPop
1835	09_24	D3_88	09D3	0.2589	BetweenCol	BetweenPop
1836	09_24	01_89	0901	0.2791	BetweenCol	Focal
1837	10_25	10_26	1010	0.1676	WithinCol	Focal
1838	10_25	11_27	1011	-0.9025	BetweenCol	Focal
1839	10_25	12_28	1012	-0.1505	BetweenCol	Focal
1840	10_25	12_29	1012	0.4576	BetweenCol	Focal
1841	10_25	03_30	1003	0.7588	BetweenCol	Focal
1842	10_25	03_31	1003	0.7588	BetweenCol	Focal
1843	10_25	03_32	1003	0.1676	BetweenCol	Focal
1844	10_25	03_33	1003	0.1676	BetweenCol	Focal
1845	10_25	03_34	1003	0.1676	BetweenCol	Focal
1846	10_25	03_35	1003	0.4776	BetweenCol	Focal
1847	10_25	03_36	1003	-0.4687	BetweenCol	Focal
1848	10_25	05_37	1005	-0.8857	BetweenCol	Focal
1849	10_25	05_38	1005	-1.0447	BetweenCol	Focal
1850	10_25	06_39	1006	-0.7196	BetweenCol	Focal
1851	10_25	06_40	1006	-0.5346	BetweenCol	Focal
1852	10_25	08_41	1008	-0.1143	BetweenCol	Focal
1853	10_25	08_42	1008	0.137	BetweenCol	Focal
1854	10_25	09_43	1009	-0.1143	BetweenCol	Focal
1855	10_25	09_44	1009	-0.0394	BetweenCol	Focal
1856	10_25	11_45	1011	0.138	BetweenCol	Focal
1857	10_25	26_46	1026	0.0359	BetweenCol	Focal
1858	10_25	26_47	1026	0.2901	BetweenCol	Focal
1859	10_25	26_48	1026	-0.752	BetweenCol	Focal
1860	10_25	29_49	1029	0.0362	BetweenCol	Focal
1861	10_25	30_50	1030	1	BetweenCol	Focal
1862	10_25	30_51	1030	0.7808	BetweenCol	Focal
1863	10_25	30_52	1030	0.1676	BetweenCol	Focal
1864	10_25	30_53	1030	0.2251	BetweenCol	Focal
1865	10_25	31_54	1031	-0.4497	BetweenCol	Focal
1866	10_25	31_55	1031	0.2891	BetweenCol	Focal
1867	10_25	32_56	1032	0.0359	BetweenCol	Focal
1868	10_25	32_57	1032	1	BetweenCol	Focal
1869	10_25	32_58	1032	1	BetweenCol	Focal
1870	10_25	33_59	1033	0.752	BetweenCol	Focal
1871	10_25	33_60	1033	-0.1143	BetweenCol	Focal
1872	10_25	35_61	1035	0.2901	BetweenCol	Focal
1873	10_25	36_62	1036	-0.2062	BetweenCol	Focal
1874	10_25	36_63	1036	-0.4525	BetweenCol	Focal
1875	10_25	37_64	1037	-0.4897	BetweenCol	Focal
1876	10_25	37_65	1037	-0.4897	BetweenCol	Focal
1877	10_25	38_66	1038	0.4776	BetweenCol	Focal
1878	10_25	39_67	1039	-0.0394	BetweenCol	Focal
1879	10_25	40_68	1040	0.4702	BetweenCol	Focal
1880	10_25	40_69	1040	0.8011	BetweenCol	Focal
1881	10_25	D1_70	10D1	-0.1218	BetweenCol	BetweenPop
1882	10_25	D1_71	10D1	0.1676	BetweenCol	BetweenPop
1883	10_25	DY_72	10DY	0.0359	BetweenCol	BetweenPop
1884	10_25	D3_73	10D3	-0.1505	BetweenCol	BetweenPop
1885	10_25	D2_74	10D2	0.2071	BetweenCol	BetweenPop
1886	10_25	D2_75	10D2	-0.1861	BetweenCol	BetweenPop
1887	10_25	D6_76	10D6	0.4576	BetweenCol	BetweenPop
1888	10_25	D4_77	10D4	-0.1218	BetweenCol	BetweenPop
1889	10_25	D5_78	10D5	0.2008	BetweenCol	BetweenPop
1890	10_25	D4_79	10D4	-0.1218	BetweenCol	BetweenPop
1891	10_25	D4_80	10D4	-0.1218	BetweenCol	BetweenPop
1892	10_25	D5_81	10D5	0.5124	BetweenCol	BetweenPop
1893	10_25	DZ_82	10DZ	0.5124	BetweenCol	BetweenPop
1894	10_25	DZ_83	10DZ	0.5727	BetweenCol	BetweenPop
1895	10_25	DY_84	10DY	-0.4654	BetweenCol	BetweenPop
1896	10_25	D3_85	10D3	-0.7294	BetweenCol	BetweenPop
1897	10_25	D3_86	10D3	-0.6251	BetweenCol	BetweenPop
1898	10_25	D3_87	10D3	-0.493	BetweenCol	BetweenPop
1899	10_25	D3_88	10D3	-0.0819	BetweenCol	BetweenPop
1900	10_25	01_89	1001	0.2891	BetweenCol	Focal
1901	10_26	11_27	1011	0.0353	BetweenCol	Focal
1902	10_26	12_28	1012	0.5845	BetweenCol	Focal
1903	10_26	12_29	1012	0.2779	BetweenCol	Focal
1904	10_26	03_30	1003	0.0849	BetweenCol	Focal
1905	10_26	03_31	1003	0.0849	BetweenCol	Focal
1906	10_26	03_32	1003	1	BetweenCol	Focal
1907	10_26	03_33	1003	0.3467	BetweenCol	Focal
1908	10_26	03_34	1003	1	BetweenCol	Focal
1909	10_26	03_35	1003	0.3016	BetweenCol	Focal
1910	10_26	03_36	1003	-0.1106	BetweenCol	Focal
1911	10_26	05_37	1005	-0.3703	BetweenCol	Focal
1912	10_26	05_38	1005	-0.7022	BetweenCol	Focal
1913	10_26	06_39	1006	-0.3222	BetweenCol	Focal
1914	10_26	06_40	1006	-0.133	BetweenCol	Focal
1915	10_26	08_41	1008	0.5963	BetweenCol	Focal
1916	10_26	08_42	1008	0.8651	BetweenCol	Focal
1917	10_26	09_43	1009	0.5963	BetweenCol	Focal
1918	10_26	09_44	1009	0.6341	BetweenCol	Focal
1919	10_26	11_45	1011	-0.0133	BetweenCol	Focal
1920	10_26	26_46	1026	0.4412	BetweenCol	Focal
1921	10_26	26_47	1026	0.4484	BetweenCol	Focal
1922	10_26	26_48	1026	-0.7844	BetweenCol	Focal
1923	10_26	29_49	1029	0.0362	BetweenCol	Focal
1924	10_26	30_50	1030	1	BetweenCol	Focal
1925	10_26	30_51	1030	0.5144	BetweenCol	Focal
1926	10_26	30_52	1030	0.8103	BetweenCol	Focal
1927	10_26	30_53	1030	0.089	BetweenCol	Focal
1928	10_26	31_54	1031	0.4213	BetweenCol	Focal
1929	10_26	31_55	1031	0.097	BetweenCol	Focal
1930	10_26	32_56	1032	-0.129	BetweenCol	Focal
1931	10_26	32_57	1032	-0.1756	BetweenCol	Focal
1932	10_26	32_58	1032	-0.1756	BetweenCol	Focal
1933	10_26	33_59	1033	-0.6826	BetweenCol	Focal
1934	10_26	33_60	1033	0.5963	BetweenCol	Focal
1935	10_26	35_61	1035	0.4484	BetweenCol	Focal
1936	10_26	36_62	1036	-0.2758	BetweenCol	Focal
1937	10_26	36_63	1036	-0.0232	BetweenCol	Focal
1938	10_26	37_64	1037	0.6457	BetweenCol	Focal
1939	10_26	37_65	1037	0.3326	BetweenCol	Focal
1940	10_26	38_66	1038	0.3016	BetweenCol	Focal
1941	10_26	39_67	1039	0.6341	BetweenCol	Focal
1942	10_26	40_68	1040	0.2928	BetweenCol	Focal
1943	10_26	40_69	1040	-0.0917	BetweenCol	Focal
1944	10_26	D1_70	10D1	0.5938	BetweenCol	BetweenPop
1945	10_26	D1_71	10D1	0.8103	BetweenCol	BetweenPop
1946	10_26	DY_72	10DY	-0.129	BetweenCol	BetweenPop
1947	10_26	D3_73	10D3	0.1171	BetweenCol	BetweenPop
1948	10_26	D2_74	10D2	-0.4115	BetweenCol	BetweenPop
1949	10_26	D2_75	10D2	-0.0578	BetweenCol	BetweenPop
1950	10_26	D6_76	10D6	0.2779	BetweenCol	BetweenPop
1951	10_26	D4_77	10D4	0.1341	BetweenCol	BetweenPop
1952	10_26	D5_78	10D5	-0.4216	BetweenCol	BetweenPop
1953	10_26	D4_79	10D4	0.1341	BetweenCol	BetweenPop
1954	10_26	D4_80	10D4	0.1341	BetweenCol	BetweenPop
1955	10_26	D5_81	10D5	-0.0943	BetweenCol	BetweenPop
1956	10_26	DZ_82	10DZ	-0.0943	BetweenCol	BetweenPop
1957	10_26	DZ_83	10DZ	-0.3599	BetweenCol	BetweenPop
1958	10_26	DY_84	10DY	-0.4802	BetweenCol	BetweenPop
1959	10_26	D3_85	10D3	0.0183	BetweenCol	BetweenPop
1960	10_26	D3_86	10D3	-0.3129	BetweenCol	BetweenPop
1961	10_26	D3_87	10D3	-0.0716	BetweenCol	BetweenPop
1962	10_26	D3_88	10D3	0.2023	BetweenCol	BetweenPop
1963	10_26	01_89	1001	0.097	BetweenCol	Focal
1964	11_27	12_28	1112	0.2117	BetweenCol	Focal
1965	11_27	12_29	1112	-0.5971	BetweenCol	Focal
1966	11_27	03_30	1103	-0.5684	BetweenCol	Focal
1967	11_27	03_31	1103	-0.5684	BetweenCol	Focal
1968	11_27	03_32	1103	0.0353	BetweenCol	Focal
1969	11_27	03_33	1103	-0.0399	BetweenCol	Focal
1970	11_27	03_34	1103	0.0353	BetweenCol	Focal
1971	11_27	03_35	1103	-0.4854	BetweenCol	Focal
1972	11_27	03_36	1103	0.0405	BetweenCol	Focal
1973	11_27	05_37	1105	-0.4567	BetweenCol	Focal
1974	11_27	05_38	1105	0.0875	BetweenCol	Focal
1975	11_27	06_39	1106	-0.3264	BetweenCol	Focal
1976	11_27	06_40	1106	0.2313	BetweenCol	Focal
1977	11_27	08_41	1108	0.2532	BetweenCol	Focal
1978	11_27	08_42	1108	0.0263	BetweenCol	Focal
1979	11_27	09_43	1109	0.2532	BetweenCol	Focal
1980	11_27	09_44	1109	-0.5677	BetweenCol	Focal
1981	11_27	11_45	1111	-0.1966	WithinCol	Focal
1982	11_27	26_46	1126	-0.7022	BetweenCol	Focal
1983	11_27	26_47	1126	-0.6078	BetweenCol	Focal
1984	11_27	26_48	1126	-0.5024	BetweenCol	Focal
1985	11_27	29_49	1129	-1.6951	BetweenCol	Focal
1986	11_27	30_50	1130	-1.871	BetweenCol	Focal
1987	11_27	30_51	1130	-0.7937	BetweenCol	Focal
1988	11_27	30_52	1130	-0.0012	BetweenCol	Focal
1989	11_27	30_53	1130	-0.8676	BetweenCol	Focal
1990	11_27	31_54	1131	0.5708	BetweenCol	Focal
1991	11_27	31_55	1131	-0.5333	BetweenCol	Focal
1992	11_27	32_56	1132	-0.5312	BetweenCol	Focal
1993	11_27	32_57	1132	-0.7663	BetweenCol	Focal
1994	11_27	32_58	1132	-0.7663	BetweenCol	Focal
1995	11_27	33_59	1133	-0.6986	BetweenCol	Focal
1996	11_27	33_60	1133	0.2532	BetweenCol	Focal
1997	11_27	35_61	1135	-0.6078	BetweenCol	Focal
1998	11_27	36_62	1136	-0.7524	BetweenCol	Focal
1999	11_27	36_63	1136	-0.2244	BetweenCol	Focal
[truncated: 1,917 more rows]
